# Supplementary material for: Supramolecular trap for a transient corannulene trianion
Source: PubMed Central journal article supplement (PMC5966907; doi:10.1039/c5sc04385a), 2015-12-17
Supplement: SC-007-C5SC04385A-s001.pdf [file SC-007-C5SC04385A-s001.pdf]

## Supporting Information

### Supramolecular Trap for a Transient Corannulene Trianion

Alexander V. Zabula,<sup>a,b</sup> Sarah N. Spisak,<sup>a</sup> Alexander S. Filatov,<sup>a</sup> Andrey Yu. Rogachev,<sup>c,\*</sup>

Rodolphe Clérac,<sup>d,e</sup> Marina A. Petrukhina<sup>a,\*</sup>

<sup>a</sup> Department of Chemistry, University at Albany, State University of New York, Albany, NY 12222-0100 (USA)

<sup>b</sup> Department of Chemistry, University of Pennsylvania, Philadelphia, PA 19104 (USA)

<sup>c</sup> Department of Chemistry, Illinois Institute of Technology, Chicago, IL 60616 (USA)

<sup>d</sup> CNRS, CRPP, UPR 8641, F-33600 Pessac (France)

<sup>e</sup> Univ. Bordeaux, CRPP, UPR 8641, F-33600 Pessac (France)

\* mpetrukhina@albany.edu; arogache@iit.edu

|                                                                                                                                                                                                                                   |     |
|-----------------------------------------------------------------------------------------------------------------------------------------------------------------------------------------------------------------------------------|-----|
| <b>Materials and Methods</b>                                                                                                                                                                                                      | S3  |
| <b>Crystallization of [Cs<sup>+</sup><sub>3</sub>(diglyme)<sub>2</sub>(C<sub>20</sub>H<sub>10</sub><sup>3-</sup>)] (1)</b>                                                                                                        | S4  |
| <b>Magnetic Measurements</b>                                                                                                                                                                                                      | S4  |
| <b>ESR Data</b>                                                                                                                                                                                                                   | S4  |
| <b>Figure S1.</b> Experimental ESR spectrum of C <sub>20</sub> H <sub>10</sub> <sup>3-</sup> generated by cesium reduction                                                                                                        | S5  |
| <b>Crystal Structure Determinations and Refinement of 1</b>                                                                                                                                                                       | S5  |
| <b>Table S1.</b> Crystallographic data for 1                                                                                                                                                                                      | S5  |
| <b>Figure S2.</b> UV-vis spectrum of 1 (in diglyme)                                                                                                                                                                               | S6  |
| <b>Figure S3.</b> UV-vis spectra of <i>in-situ</i> generated products in diglyme using (a) excess Cs and (b) excess Li and Cs (3.5 eq.)                                                                                           | S7  |
| <b>Theoretical Calculations</b>                                                                                                                                                                                                   | S7  |
| <b>Figure S4.</b> Equilibrium structures for models 1- <i>small</i> , 1H- <i>small</i> , and 1 <sup>4-</sup> - <i>small</i>                                                                                                       | S8  |
| <b>Figure S5.</b> Equilibrium structures for models 1- <i>full</i> and 1H- <i>full</i>                                                                                                                                            | S8  |
| <b>Figure S6.</b> Equilibrium structures for (a) “naked” trianion C <sub>20</sub> H <sub>10</sub> <sup>3-</sup> , and (b) neutral corannulene (PBE0/cc-pVDZ)                                                                      | S9  |
| <b>Figure S7.</b> CASSCF(6,4) natural orbitals along with occupancies for 1- <i>small</i> model                                                                                                                                   | S10 |
| <b>Figure S8.</b> CASSCF(14,8) natural orbitals along with occupancies for 1- <i>small</i> model                                                                                                                                  | S11 |
| <b>Figure S9.</b> CASSCF(6,4) natural orbitals along with occupancies for 1H- <i>small</i> model                                                                                                                                  | S11 |
| <b>Figure S10.</b> CASSCF(14,8) natural orbitals along with occupancies for 1H- <i>small</i> model                                                                                                                                | S12 |
| <b>Table S2.</b> Absolute energies of 1- <i>small</i> , 1H- <i>small</i> , 1- <i>full</i> , and 1H- <i>full</i> as well as of “naked” trianion C <sub>20</sub> H <sub>10</sub> <sup>3-</sup> (PBE0/def2-TZVP(Cs)//cc-pVDZ(C,H,O)) | S12 |
| <b>Table S3.</b> Absolute energies of all systems as results of broken-symmetry calculations (PBE0/TZVP/ZORA)                                                                                                                     | S12 |
| <b>Table S4.</b> Absolute energies of 1- <i>small</i> and 1H- <i>small</i> systems as results of MRMP2 calculations based on different converged CASSCF wavefunctions (CAS(6,4) and CAS(14,8))                                    | S13 |
| <b>Figure S11.</b> LUMO+1 for neutral C <sub>20</sub> H <sub>10</sub> molecule (PBE0/cc-pVDZ)                                                                                                                                     | S13 |
| <b>Table S5.</b> Cartesian coordinates for 1- <i>small</i> system, optimized at the PBE0/def2-TZVP(Cs)//cc-pVDZ(C,H,O) level of theory                                                                                            | S14 |

|                                                                                                                                                                                                     |     |
|-----------------------------------------------------------------------------------------------------------------------------------------------------------------------------------------------------|-----|
| <b>Table S6.</b> Cartesian coordinates for $\mathbf{1}^{4-}$ - <i>small</i> system, optimized at the PBE0/def2-TZVP(Cs)//cc-pVDZ(C,H,O) level of theory                                             | S15 |
| <b>Table S7.</b> Cartesian coordinates for $\mathbf{1H}$ - <i>small</i> system, optimized at the PBE0/def2-TZVP(Cs)//cc-pVDZ(C,H,O) level of theory                                                 | S16 |
| <b>Table S8.</b> Cartesian coordinates for $\mathbf{1}$ - <i>full</i> system, optimized at the PBE0/def2-TZVP(Cs)//cc-pVDZ(C,H,O) level of theory                                                   | S17 |
| <b>Table S9.</b> Cartesian coordinates for $\mathbf{1H}$ - <i>full</i> system, optimized at the PBE0/def2-TZVP(Cs)//cc-pVDZ(C,H,O) level of theory                                                  | S19 |
| <b>Table S10.</b> Cartesian coordinates for “naked” trianion $\text{C}_{20}\text{H}_{10}^{*3-}$ , optimized at the PBE0/cc-pVDZ level of theory                                                     | S22 |
| <b>Table S11.</b> Cartesian coordinates for neutral $\text{C}_{20}\text{H}_{10}$ , optimized at the PBE0/cc-pVDZ level of theory                                                                    | S23 |
| <b>Table S12.</b> NBO charges for $\mathbf{1}$ - <i>small</i> model (PBE0/def2-TZVP(Cs)//cc-pvDZ(C,H,O))                                                                                            | S23 |
| <b>Table S13.</b> NBO charges for $\mathbf{1}$ - <i>small</i> model (PBE0/def2-TZVP(Cs)//cc-pvDZ(C,H,O))                                                                                            | S24 |
| <b>Table S14.</b> NBO charges for $\mathbf{1}^{4-}$ - <i>small</i> model (PBE0/def2-TZVP(Cs)//cc-pvDZ(C,H,O))                                                                                       | S25 |
| <b>Table S15.</b> NBO charges for $\mathbf{1}$ - <i>full</i> model (PBE0/def2-TZVP(Cs)//cc-pvDZ(C,H,O))                                                                                             | S26 |
| <b>Table S16.</b> NBO charges for $\mathbf{1H}$ - <i>full</i> model (PBE0/def2-TZVP(Cs)//cc-pvDZ(C,H,O))                                                                                            | S29 |
| <b>Table S17.</b> NBO charges for “naked” $\text{C}_{20}\text{H}_{10}^{*3-}$ (PBE0/cc-pvDZ)                                                                                                         | S32 |
| <b>Table S18.</b> NBO charges for neutral $\text{C}_{20}\text{H}_{10}$ (PBE0/cc-pvDZ)                                                                                                               | S32 |
| <b>EDA Analysis of Sandwich-Type Aggregates</b>                                                                                                                                                     | S33 |
| <b>Figure S12.</b> EDA Fragmentation scheme in $\mathbf{1}$ - <i>small</i> and $\mathbf{1H}$ - <i>small</i> models ( <i>left</i> ) as well as for $\mathbf{1}^{4-}$ - <i>small</i> ( <i>right</i> ) | S33 |
| <b>Figure S13.</b> EDA Fragmentation scheme in $\mathbf{1}$ - <i>full</i> and $\mathbf{1H}$ - <i>full</i> models                                                                                    | S34 |
| <b>References</b>                                                                                                                                                                                   | S34 |

## Materials and Methods.

All manipulations were carried out using break-and-seal<sup>[1]</sup> and glove-box techniques under an atmosphere of argon. THF and hexanes were dried over Na/benzophenone and distilled prior to use. Diglyme was dried over NaK<sub>2</sub> alloy and vacuum-transferred. Lithium and dicyclohexano-18-crown-6 (99%) were purchased from Sigma-Aldrich. Cesium was purchased from Strem Chemicals. Crown ether was dried over P<sub>2</sub>O<sub>5</sub> *in vacuo* for 24 hours. Corannulene was prepared as described previously<sup>[2-4]</sup> and sublimed at 175 °C prior to use. The UV-vis spectra were recorded on a PerkinElmer Lambda 35 spectrometer. The ESR spectra were recorded on a Bruker ER-200 D-SRC X-band spectrometer that is interfaced to a Compaq 386 PC equipped with the IBM analog-to-digital converter and Scientific Software Services Systems (Bloomington, IL). The trianion of corannulene was generated by the reaction of cesium metal or Li/Cs mixture (excess) with the solution of C<sub>20</sub>H<sub>10</sub> in THF ( $\approx 4 \times 10^{-4}$  M) in the sealed quartz capillary ( $\varnothing$  1.0 mm) at 25 °C. The probe for the ESR study was also prepared by dissolving crystals of **1** and transferring the resulting solution ( $\approx 2 \times 10^{-5}$  M) into the quartz capillary ( $\varnothing$  0.6 mm), which was then sealed. Magnetic measurements were performed on polycrystalline samples of **1** (between 10 and 20 mg). The samples were manipulated in a drybox under nitrogen atmosphere and sealed in a polyethylene bag (3 × 0.5 × 0.02 cm; between 20 and 35 mg) in order to collect data in the temperature range of 1.8 to 300 K at 1000 Oe. Magnetic measurements were obtained with the use of a Quantum Design SQUID magnetometer MPMS-XL functioning between 1.8 and 400 K for direct-current (dc) applied fields ranging from -7 to +7 T. Prior to the experiment, the field-dependent magnetization was measured at 100 K on the sample in order to prove the absence of any bulk ferromagnetic impurities. The magnetic data were corrected for the sample holder and diamagnetic contributions. Elemental analysis was performed by Complete Analysis Laboratories, Inc., Parsippany, NJ.

### **Crystallization of $[\text{Cs}^+_3(\text{diglyme})_2(\text{C}_{20}\text{H}_{10}^{3-})]$ (**1**).**

**Direct Cs reduction.** Diglyme (3 mL) was added to a flask containing Cs metal (28 mg, 0.21 mmol, 3.5 eq.), corannulene (15 mg, 0.06 mmol), and dicyclohexano-18-crown-6 (22 mg, 0.06 mmol). The resulting green mixture was stirred at room temperature for 60 hours to give a bright purple-red solution. This solution was filtered, layered with hexanes (3 mL), and kept at 10 °C. A few X-ray quality crystals of **1** were collected in 4 weeks. Yield: 5.5 mg, 10%.

**Cs/Li reduction.** Diglyme (3 mL) was added to a flask containing Cs metal (28 mg, 0.21 mmol, 3.5 eq.), Li (0.85 mg, 0.12 mmol), and corannulene (15 mg, 0.06 mmol). The resulting green solution was stirred at room temperature for 16 hours to give a bright purple-red solution. This solution was filtered, layered with hexanes (3 mL), and kept at 10 °C. The X-ray quality crystals (prisms) of **1** were deposited in 72 hours. Crystals of **1** were collected, washed with hexanes (2 x 3 mL), dried and used for characterization. Yield: 19.3 mg, 35%.

UV-vis (diglyme, nm):  $\lambda_{\text{max}} = 388$ . UV-vis (THF, nm):  $\lambda_{\text{max}} = 386$ . Anal. Calcd for  $\text{C}_{32}\text{H}_{38}\text{Cs}_3\text{O}_6$ : C, 41.90; H, 4.18; Found: C, 41.78; H, 4.14.

**Magnetic Measurements.** Multiple samples of single crystals collected from the above reactions have been sent for magnetic measurements over the period of two years. All our attempts to collect good sets of magnetic data have failed likely due to extreme air- and moisture sensitivity of the title product. Our rough estimates point out to very weak interactions of corannulene trianions within the sandwich-type assemblies with an exchange coupling between -5 and -10 K, which makes a gap between the singlet ground state and the triplet state of about 10–20 K. This is consistent with our theoretical calculations showing degeneracy of the two states. Unfortunately, the absolute values of the susceptibility could not be obtained reliably.

**ESR Data.** Using probes prepared by dissolving the crystals of **1** in THF or diglyme, we were unable to detect any well-resolved ESR signal. Only in the presence of an excess of cesium metal upon the *in situ* reduction of C<sub>20</sub>H<sub>10</sub> in THF the highly resolved ESR signal centered at  $g = 2.0038$  could be observed in 24 h (Figure S1). These ESR data point out to the formation of trianion-radicals in solution, consistent with previous works of Scott and coworkers.<sup>[5]</sup> However, it has to be mentioned here that we could not isolate the sandwich type aggregates from the THF solutions, as the title product is formed only when diglyme is used as a solvent media.

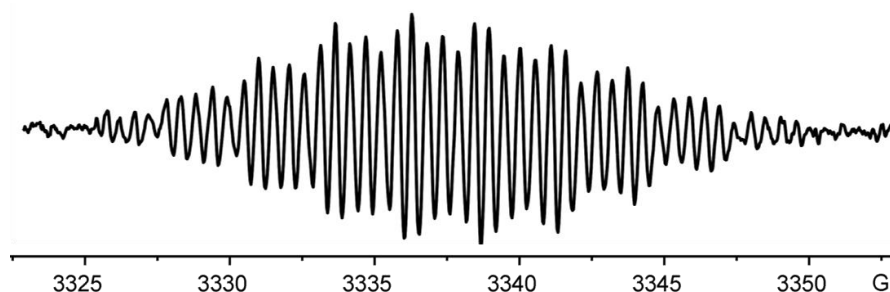

**Figure S1.** Experimental ESR spectrum of C<sub>20</sub>H<sub>10</sub><sup>3-</sup> generated by *in situ* cesium reduction.

**Crystal Structure Determinations and Refinement of 1.** Data collection was performed on a Bruker SMART APEX CCD-based X-ray diffractometer with graphite-monochromated Mo-K $\alpha$  radiation ( $\lambda = 0.71073 \text{ \AA}$ ) at  $T = 100(2) \text{ K}$ . Data were corrected for absorption effects using the empirical method SADABS.<sup>[6]</sup> The structure was solved by direct methods and refined using the Bruker SHELXTL (Version 6.14) software package.<sup>[7]</sup> Hydrogen atoms were included at idealized positions using the riding model. For further crystal and data collection details see Table S1.

**Table S1.** Crystallographic data for **1**.

| Parameter         | <b>1</b>                                                       |
|-------------------|----------------------------------------------------------------|
| Empirical formula | C <sub>32</sub> H <sub>38</sub> Cs <sub>3</sub> O <sub>6</sub> |
| $M_r$             | 917.35                                                         |

|                                                                   |                |
|-------------------------------------------------------------------|----------------|
| Crystal system                                                    | monoclinic     |
| Space group                                                       | <i>C2/c</i>    |
| <i>a</i> (Å)                                                      | 23.597(3)      |
| <i>b</i> (Å)                                                      | 14.073(2)      |
| <i>c</i> (Å)                                                      | 19.874(3)      |
| $\alpha$ (°)                                                      | 90             |
| $\beta$ (°)                                                       | 93.283(2)      |
| $\gamma$ (°)                                                      | 90             |
| <i>V</i> (Å <sup>3</sup> )                                        | 6589.1(16)     |
| <i>Z</i>                                                          | 8              |
| $\rho_{\text{calcd}}$ [g·cm <sup>-3</sup> ]                       | 1.849          |
| $\mu$ [mm <sup>-1</sup> ]                                         | 3.342          |
| Reflections collected                                             | 27870          |
| 2 $\theta$ -range [deg]                                           | 3.38–56.54     |
| independent reflections, $R_{\text{int}}$                         | 7687, 0.0465   |
| data/restraints/parameters                                        | 7687/0/374     |
| $R_1$ , <sup>[a]</sup> $wR_2$ <sup>[b]</sup> [ $I > 2\sigma(I)$ ] | 0.0449, 0.0978 |
| $R_1$ , <sup>[a]</sup> $wR_2$ <sup>[b]</sup> [all data]           | 0.0598, 0.1052 |
| quality of fit <sup>[c]</sup>                                     | 1.090          |
| peak/hole [e·Å <sup>-3</sup> ]                                    | 1.834/–1.062   |

[a]  $R_1 = \sum ||F_o| - |F_c|| / \sum |F_o|$ . [b]  $wR_2 = [\sum w(F_o^2 - F_c^2)^2 / \sum w(F_o^2)^2]^{1/2}$ . [c] Quality-of-fit =  $[\sum w(F_o^2 - F_c^2)^2 / (N_{\text{obs}} - N_{\text{params}})]^{1/2}$ , based on all data.

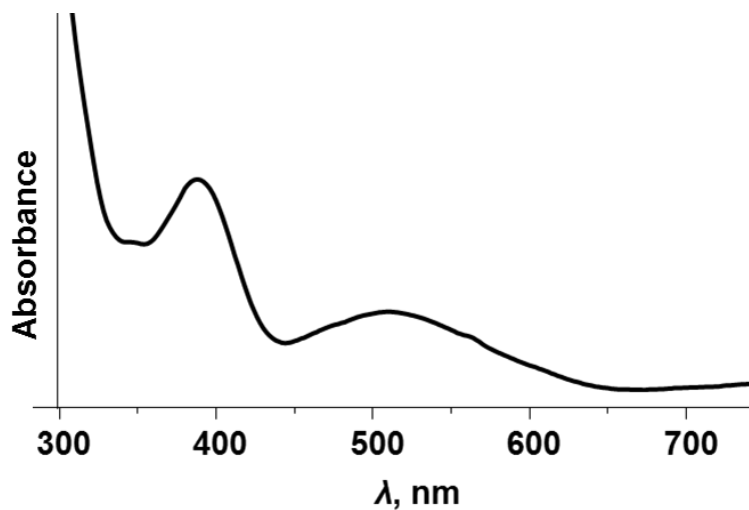

**Figure S2.** UV-vis spectrum of **1** (in diglyme).

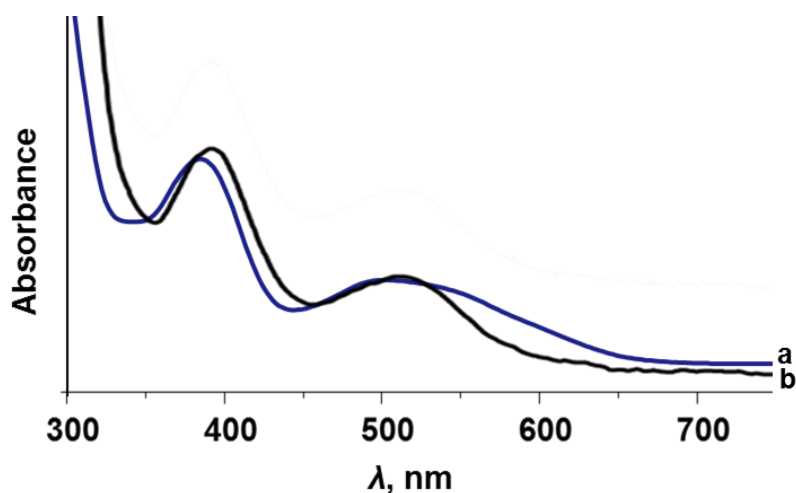

**Figure S3.** UV-vis spectra of *in-situ* generated products in diglyme using (a) excess Cs and (b) excess Li and Cs (3.5 eq.).

### Theoretical Calculations

Geometry optimizations for systems **1-small**, **1<sup>4-</sup>-small**, and **1-full** (Figures S3-S4) were performed at the PBE0/def2-TZVP(Cs)//cc-pVDZ(C,H,O) level of theory. Geometry optimizations of the structures of neutral C<sub>20</sub>H<sub>10</sub> and “naked” trianion C<sub>20</sub>H<sub>10</sub><sup>3-</sup> species (Figure S6) were carried out at the PBE0/cc-pVDZ level of theory. All calculations were carried out with the Firefly program package (version 8.1.0).<sup>[8]</sup> The calculated structures correspond to the local minimum (no imaginary frequencies) on the corresponding potential energy surfaces, as determined by calculation of the full Hessian matrix followed by estimation of frequencies in the harmonic approximation. In the case of **1H-small** and **1H-full** models, only positions of hydrogen atoms were optimized, whereas positions of other atoms were taken from the crystal structure and kept frozen (Figures S4-S5). These calculations were performed with the ORCA program suite (version 3.0.3).<sup>[9]</sup> In this part, all atoms were described by relativistically re-contracted basis sets of triple- $\zeta$  quality (SARS-TZVP).<sup>[10]</sup> All calculations were carried out with RIJCOSX acceleration technique.<sup>[11]</sup> Scalar relativistic effects have been incorporated by applying the 0<sup>th</sup>-order regular approximation (ZORA). All optimized geometries were then used for subsequent analysis of the electronic structure of the

product in terms of natural bond orbitals (NBO) approach.<sup>[12]</sup> All NBO computations were performed with the NBO 6.0 program.<sup>[13]</sup> Broken-symmetry (BS-PBE0) calculations were performed with help of ORCA package using Yamaguchi formula<sup>[14]</sup> for calculating  $J$  coupling constant.

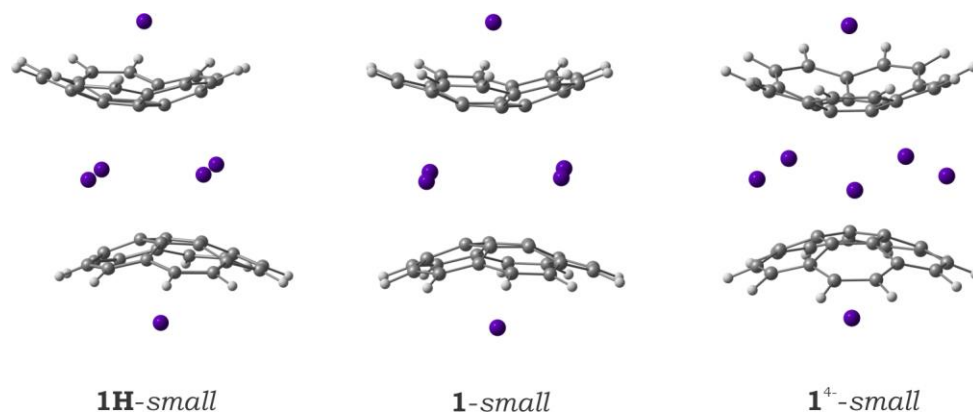

**Figure S4.** Equilibrium structures for models **1-small**, **1H-small**, and **1<sup>4-</sup>-small**.

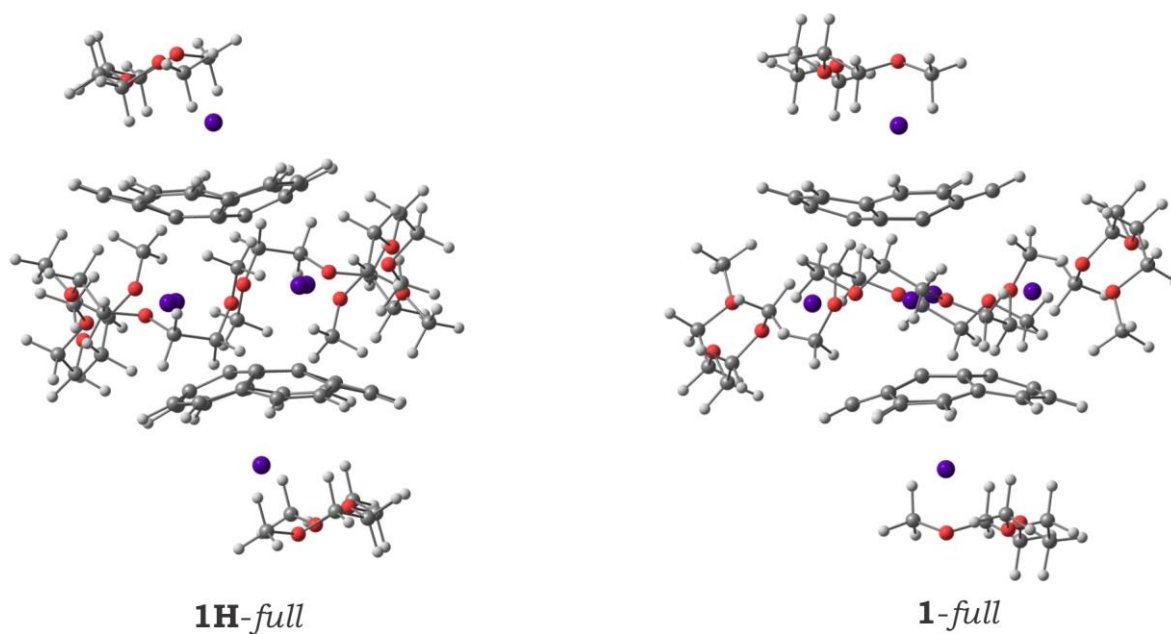

**Figure S5.** Equilibrium structures for models **1-full** and **1H-full**.



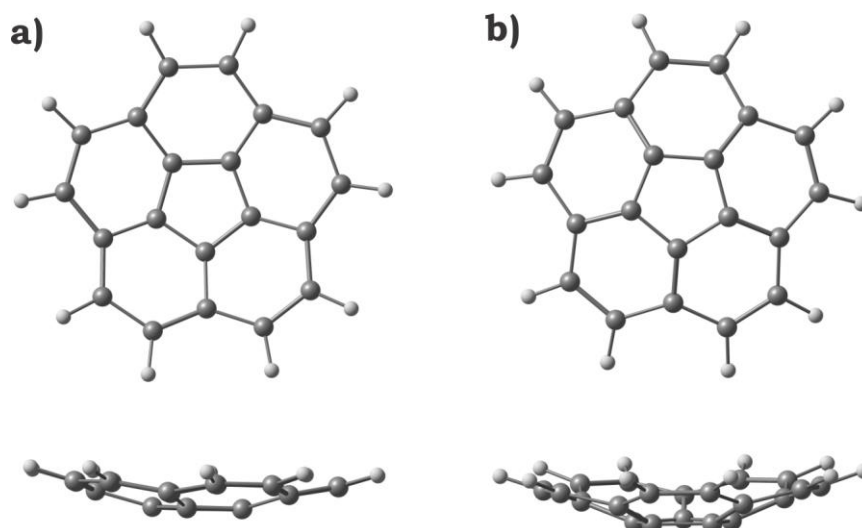

**Figure S6.** Equilibrium structures for (a) “naked” trianion  $C_{20}H_{10}^{3-}$ , and (b) neutral corannulene (PBE0/cc-pVDZ).

Multireference calculations were performed at the level of multiconfigurational perturbation theory of the second in XMCQDPT2 variant.<sup>[15]</sup> The same basis sets were utilized as for the geometry optimization (def2-TZVP(Cs)//cc-pVDZ(C,H,O)). Two different active spaces, namely (6,4) and (14,8) were considered for reference CASSCF calculations. The first active space includes all doubly and singly occupied orbitals on the top of neutral corannulene and 6 cesium cations. This active space comes from the electronic structure of corannulene, which has two degenerate LUMOs of  $\pi$ -symmetry. These orbitals are populated when the system is reduced. Totally, this active space describes 6 electrons shared over 4 orbitals. The second active space (14 shared over 8 orbitals or 14/8 approach) was constructed by adding four occupied MOs, which represent two degenerate HOMOs of the neutral corannulene. These additional orbitals correspond to the bonding partners of LUMOs in  $C_{20}H_{10}$ . Both active spaces used in this study are depicted in Figures S7-S8 and Figures S9-S10 for systems **1-small** and **1H-small**, respectively. An initial guess of the orbitals for CASSCF calculations were taken from the converged PBE0 calculations. CASSCF calculations were performed using a state-average approach. The lowest-lying one singlet and

one triplet states were considered (with ALDET keyword in Firefly terminology). The singlet state was found corresponding to an open-shell singlet electronic state. The converged CASSCF wavefunction was further used as a reference wavefunction for the calculations by multireference Møller-Plesset perturbation theory of the second order (MRMP2). The MRMP2 model is a special state-specific case of the XMCQDPT2 theory that was recently developed by Granovsky.<sup>[15]</sup> The conventional intruder state avoidance (ISA) technique<sup>[16]</sup> was used in MRPT2 calculations.

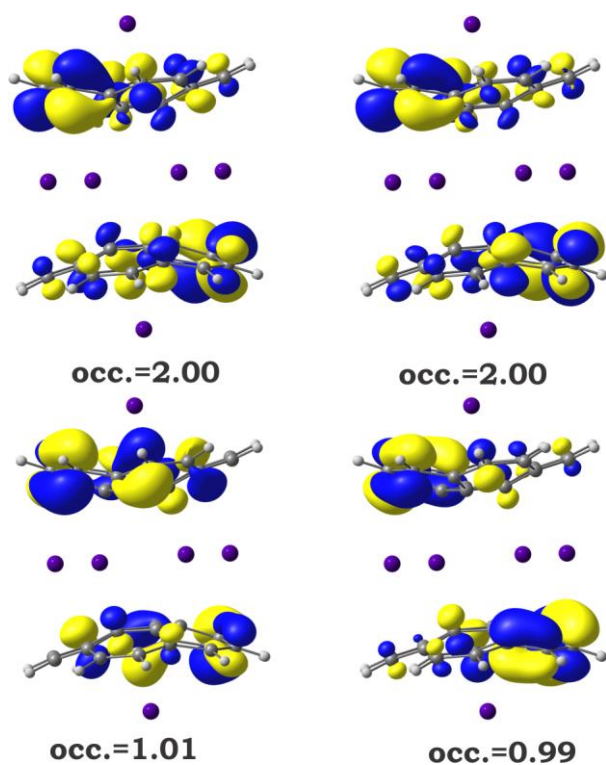

**Figure S7.** CASSCF(6,4) natural orbitals along with occupancies for 1-*small* model.

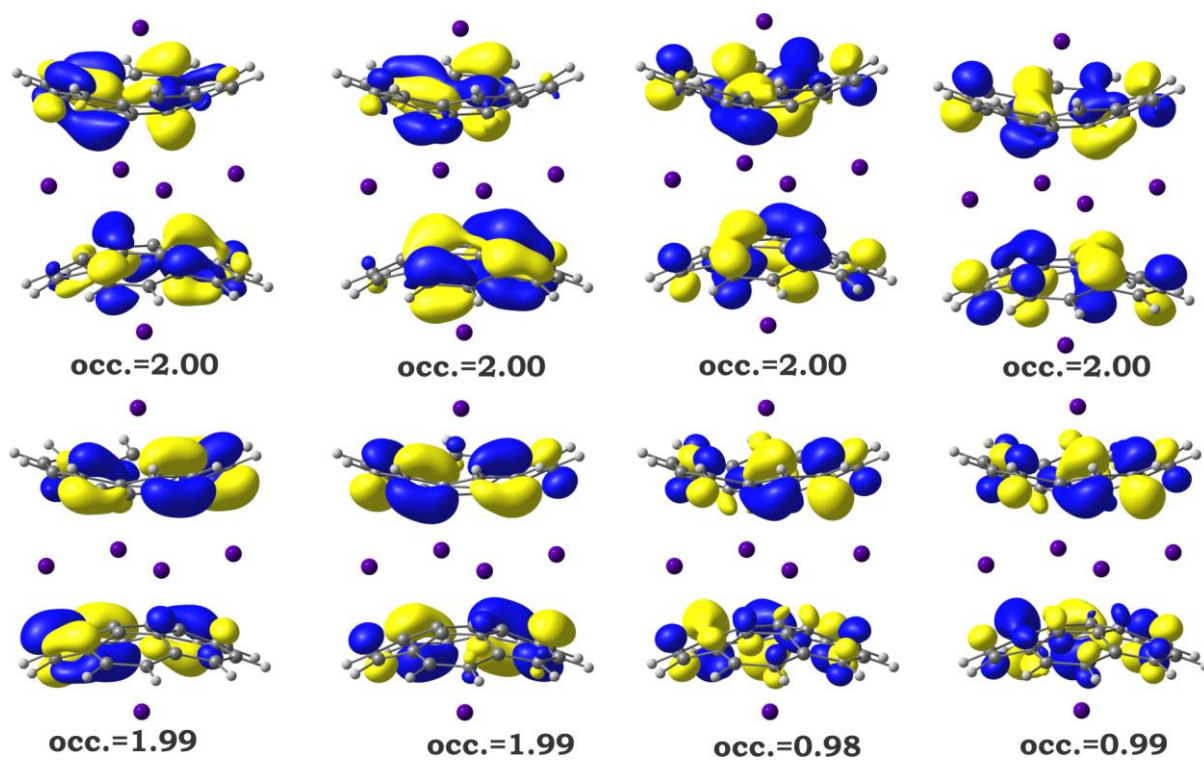

Figure S8. CASSCF(14,8) natural orbitals along with occupancies for 1-*small* model.

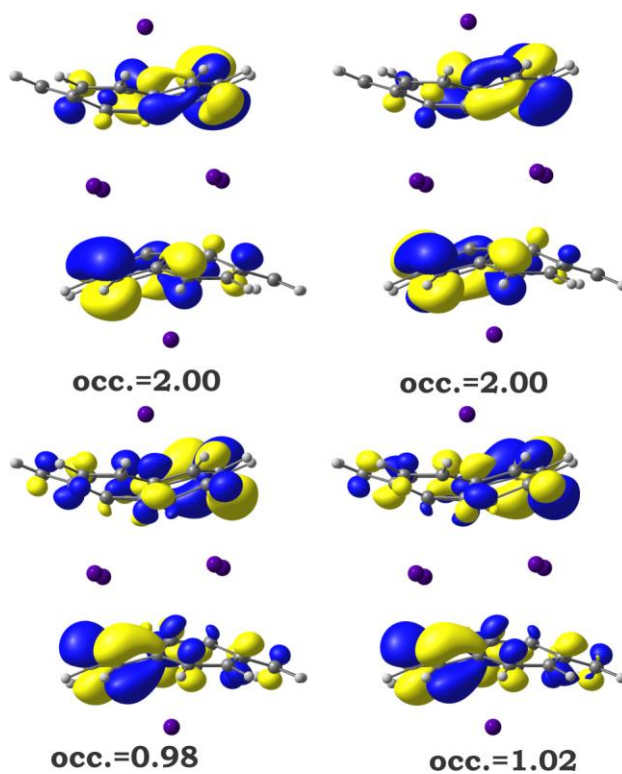

Figure S9. CASSCF(6,4) natural orbitals along with occupancies for 1H-*small* model.

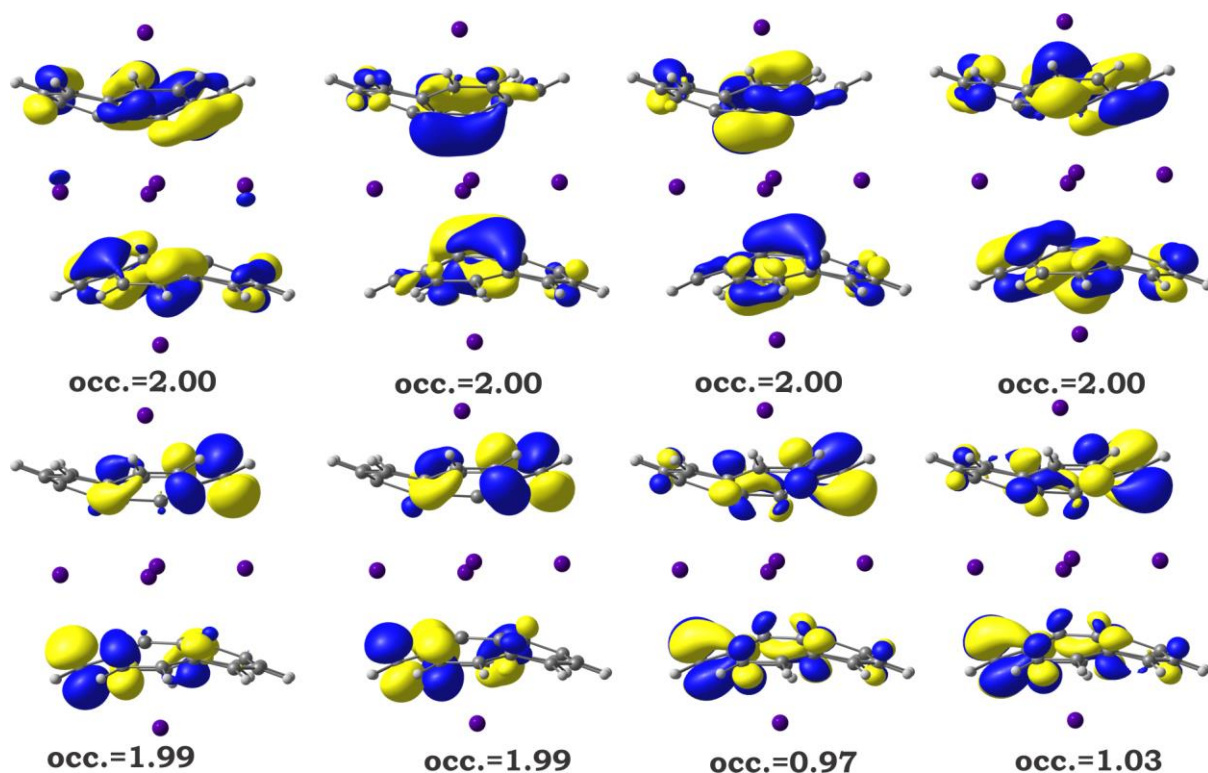

**Figure S10.** CASSCF(14,8) natural orbitals along with occupancies for **1H-small** model.

**Table S2.** Absolute energies of **1-small**, **1H-small**, **1-full**, and **1H-full** as well as of “naked”  $C_{20}H_{10}^{*3-}$  anion and neutral corannulene (PBE0/def2-TZVP(Cs)//cc-pVDZ(C,H,O)).

| Compound                    | Energy, a.u.     |
|-----------------------------|------------------|
| <b>1-small</b>              | -1655.7565934532 |
| <b>1H-small</b>             | -1655.7403447424 |
| <b>1<sup>4-</sup>-small</b> | -1675.9241888309 |
| <b>1-full</b>               | -4428.9866489306 |
| <b>1H-full</b>              | -4428.9548977736 |
| $C_{20}H_{10}^{*3-}$        | -766.9410257367  |
| $C_{20}H_{10}$              | -767.3150125812  |

**Table S3.** Absolute energies of all systems as results of broken-symmetry calculations (PBE0/TZVP/ZORA).

|                | State               | Energy, a.u.  |
|----------------|---------------------|---------------|
| <b>1-small</b> | Triplet (high-spin) | -49035.059958 |
|                | Broken-symmetry     | -49035.059969 |

|                 |                     |               |
|-----------------|---------------------|---------------|
| <b>1H-small</b> | Triplet (high-spin) | -49035.045014 |
|                 | Broken-symmetry     | -49035.044997 |
| <b>1-full</b>   | Triplet (high-spin) | -51811.568480 |
|                 | Broken-symmetry     | -51811.568467 |
| <b>1H-full</b>  | Triplet (high-spin) | -51811.530492 |
|                 | Broken-symmetry     | -51811.530490 |

**Table S4.** Absolute energies of **1-small** and **1H-small** systems as results of MRMP2 calculations based on different converged CASSCF wavefunctions (CAS(6,4) and CAS(14,8)).

|                 |           | State              | Energy, a.u.       |
|-----------------|-----------|--------------------|--------------------|
| <b>1-small</b>  | CAS(6,4)  | Singlet state (OS) | -1650.579469309603 |
|                 |           | Triplet state      | -1650.579466511464 |
|                 | CAS(14,8) | Singlet state (OS) | -1650.568198642138 |
|                 |           | Triplet state      | -1650.568201337413 |
| <b>1H-small</b> | CAS(6,4)  | Singlet state (OS) | -1650.557621718485 |
|                 |           | Triplet state      | -1650.557607114330 |
|                 | CAS(14,8) | Singlet state (OS) | -1650.546739878118 |
|                 |           | Triplet state      | -1650.546721943810 |

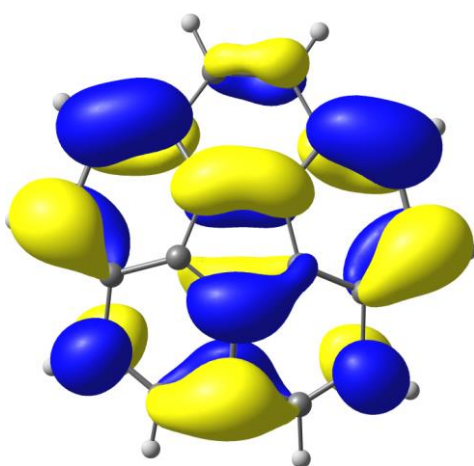

**Figure S11.** LUMO+1 for neutral  $C_{20}H_{10}$  molecule (PBE0/cc-pVDZ).

**Table S5.** Cartesian coordinates for **1-small** system, optimized at the PBE0/def2-TZVP(Cs)//cc-pVDZ(C,H,O) level of theory.

|    |              |              |              |
|----|--------------|--------------|--------------|
| Cs | 5.293312240  | 0.041387413  | -0.354440048 |
| Cs | -0.117419400 | -2.762787425 | -1.883212717 |
| C  | 3.223404160  | 3.335688316  | -0.198425198 |
| H  | 3.562490767  | 4.310830343  | -0.562730510 |
| C  | 3.400349550  | 3.060869815  | 1.184146788  |
| H  | 3.836969894  | 3.856323907  | 1.800219550  |
| C  | 3.132829340  | 1.785066810  | 1.770845916  |
| C  | 3.541138300  | 1.166011648  | 2.990473409  |
| H  | 3.983396346  | 1.780470849  | 3.783182482  |
| C  | 3.529761250  | -0.239801482 | 3.189910002  |
| H  | 3.973003320  | -0.620255774 | 4.116050687  |
| C  | 3.161312350  | -1.169434765 | 2.149382237  |
| C  | 3.429794986  | -2.556000974 | 1.944137564  |
| H  | 3.890322831  | -3.142757626 | 2.746284072  |
| C  | 3.302704532  | -3.185531943 | 0.658327757  |
| H  | 3.685391873  | -4.207703747 | 0.564024987  |
| C  | 2.891437194  | -2.484779812 | -0.505928392 |
| C  | 3.122508581  | -2.712126324 | -1.912033927 |
| H  | 3.490026222  | -3.690950105 | -2.242645193 |
| C  | 3.008986573  | -1.696940407 | -2.896657424 |
| H  | 3.315168090  | -1.953100494 | -3.916916653 |
| C  | 2.710665419  | -0.312085836 | -2.579533368 |
| C  | 3.022422488  | 0.898879744  | -3.243613746 |
| H  | 3.371003482  | 0.871283084  | -4.281811191 |
| C  | 3.104393847  | 2.174870837  | -2.553860171 |
| H  | 3.496757082  | 3.025651218  | -3.121535835 |
| C  | 2.864399742  | 2.309600953  | -1.160862203 |
| C  | 2.398701913  | 1.113307263  | -0.536023918 |
| C  | 2.530793478  | 0.863656794  | 0.846764541  |
| C  | 2.555756562  | -0.535207763 | 1.028471413  |
| C  | 2.415900585  | -1.157222045 | -0.240454758 |
| C  | 2.325099468  | -0.140977115 | -1.209160726 |
| Cs | 0.114231952  | -1.970148507 | 2.711431156  |
| Cs | -5.293326816 | -0.041380625 | 0.354227002  |
| Cs | 0.117448903  | 2.762492176  | 1.883772701  |
| C  | -3.223492322 | -3.335604249 | 0.198463727  |
| H  | -3.562723309 | -4.310643339 | 0.562751499  |
| C  | -3.400379643 | -3.060861677 | -1.184162613 |
| H  | -3.836998725 | -3.856226093 | -1.800319618 |
| C  | -3.132867460 | -1.785039590 | -1.770814615 |
| C  | -3.541098973 | -1.165995743 | -2.990566457 |
| H  | -3.983347408 | -1.780379942 | -3.783274131 |
| C  | -3.529614879 | 0.239755747  | -3.190071348 |
| H  | -3.972932894 | 0.620244591  | -4.116221538 |
| C  | -3.161315622 | 1.169412957  | -2.149428192 |
| C  | -3.429940335 | 2.555960284  | -1.944168921 |
| H  | -3.890292734 | 3.142756374  | -2.746428355 |
| C  | -3.302658531 | 3.185500990  | -0.658299108 |
| H  | -3.685637303 | 4.207572795  | -0.563907123 |
| C  | -2.891501788 | 2.484694479  | 0.505942037  |
| C  | -3.122472697 | 2.712100682  | 1.912091291  |
| H  | -3.490187330 | 3.690929951  | 2.242530104  |
| C  | -3.009012021 | 1.696874093  | 2.896689510  |
| H  | -3.315103809 | 1.953197244  | 3.916888308  |
| C  | -2.710560297 | 0.312017996  | 2.579626926  |
| C  | -3.022433415 | -0.898909292 | 3.243577757  |
| H  | -3.370854484 | -0.871364818 | 4.281853238  |
| C  | -3.104236712 | -2.174805809 | 2.553886500  |
| H  | -3.496712700 | -3.025551255 | 3.121507779  |
| C  | -2.864427033 | -2.309557334 | 1.160798087  |
| C  | -2.398721866 | -1.113281900 | 0.535994330  |
| C  | -2.530724297 | -0.863661485 | -0.846792296 |
| C  | -2.555614623 | 0.535200961  | -1.028533217 |
| C  | -2.415994976 | 1.157176439  | 0.240478050  |
| C  | -2.325051614 | 0.140911779  | 1.209149478  |
| Cs | -0.114227306 | 1.970376764  | -2.711047376 |

**Table S6.** Cartesian coordinates for  $1^{4-}$ -small system, optimized at the PBE0/def2-TZVP(Cs)//cc-pVDZ(C,H,O) level of theory.

|    |              |              |              |
|----|--------------|--------------|--------------|
| Cs | -1.038500000 | 3.098199999  | -0.679900000 |
| Cs | 1.546899999  | -2.881299999 | -1.332499999 |
| C  | -1.662299999 | -2.049199999 | -0.351900000 |
| C  | -2.287099999 | -1.161599999 | 0.561400000  |
| C  | -2.568299999 | 0.047300000  | -0.125200000 |
| C  | -2.117699999 | -0.093100000 | -1.462799999 |
| C  | -1.557899999 | -1.388899999 | -1.602999999 |
| C  | -1.481699999 | -2.089099999 | -2.866899999 |
| C  | -1.349399999 | -3.505999998 | -2.713999999 |
| H  | -1.323099999 | -4.138299998 | -3.610499998 |
| C  | -1.454099999 | -4.175899998 | -1.444899999 |
| H  | -1.501199999 | -5.271999998 | -1.462499999 |
| C  | -1.702999999 | -3.488799998 | -0.213900000 |
| C  | -2.284399999 | -3.915999998 | 1.022300000  |
| H  | -2.400799999 | -4.990199998 | 1.213199999  |
| C  | -2.916299999 | -3.015399999 | 1.949499999  |
| H  | -3.470499998 | -3.465999998 | 2.782499999  |
| C  | -3.025699999 | -1.606399999 | 1.722999999  |
| C  | -3.947399998 | -0.625000000 | 2.208799999  |
| H  | -4.588199998 | -0.873000000 | 3.064299999  |
| C  | -4.233699998 | 0.600700000  | 1.511799999  |
| H  | -5.072699998 | 1.201599999  | 1.884699999  |
| C  | -3.622999998 | 0.956500000  | 0.267300000  |
| C  | -4.043199998 | 1.817799999  | -0.796100000 |
| H  | -4.866499998 | 2.521099999  | -0.618700000 |
| C  | -3.586699998 | 1.674999999  | -2.153099999 |
| H  | -4.094199998 | 2.279199999  | -2.915599999 |
| C  | -2.668699999 | 0.658900000  | -2.569499999 |
| C  | -2.435599999 | 0.037900000  | -3.838199998 |
| H  | -2.845999999 | 0.503800000  | -4.742899998 |
| C  | -1.867699999 | -1.276499999 | -3.980299998 |
| H  | -1.885199999 | -1.720799999 | -4.983499998 |
| Cs | 0.265900000  | -2.481999999 | 2.480699999  |
| C  | 2.488399999  | -0.383800000 | 0.868000000  |
| C  | 2.591899999  | 0.278600000  | -0.382100000 |
| C  | 2.034099999  | 1.574599999  | -0.238800000 |
| C  | 1.585499999  | 1.713599999  | 1.099600000  |
| C  | 1.866299999  | 0.503400000  | 1.783699999  |
| C  | 2.051799999  | 0.425900000  | 3.216499999  |
| C  | 2.782999999  | -0.735300000 | 3.623499998  |
| H  | 3.015399999  | -0.873100000 | 4.687099998  |
| C  | 3.414999998  | -1.634499999 | 2.694899999  |
| H  | 4.085199998  | -2.394799999 | 3.115299999  |
| C  | 3.371999998  | -1.454199999 | 1.275599999  |
| C  | 4.242599998  | -1.890499999 | 0.226300000  |
| H  | 4.982599998  | -2.672499999 | 0.438400000  |
| C  | 4.346999998  | -1.219199999 | -1.042200000 |
| H  | 5.159299998  | -1.536399999 | -1.708199999 |
| C  | 3.590499998  | -0.050900000 | -1.376099999 |
| C  | 3.826199998  | 1.012400000  | -2.304999999 |
| H  | 4.593699998  | 0.883800000  | -3.078599999 |
| C  | 3.258399999  | 2.326599999  | -2.160699999 |
| C  | 3.632199998  | 3.107799999  | -2.834399999 |
| C  | 2.403999999  | 2.696599999  | -1.073300000 |
| C  | 2.108899999  | 3.961699998  | -0.472200000 |
| H  | 2.385899999  | 4.881299998  | -1.002900000 |
| C  | 1.654099999  | 4.102799998  | 0.885400000  |
| H  | 1.615899999  | 5.119999998  | 1.294999999  |
| C  | 1.453899999  | 2.991499999  | 1.764999999  |
| C  | 1.466299999  | 2.881999999  | 3.192199999  |
| H  | 1.412399999  | 3.795899998  | 3.797099998  |
| C  | 1.752299999  | 1.654799999  | 3.886499998  |
| H  | 1.897399999  | 1.718899999  | 4.972199998  |
| Cs | -4.540699998 | -1.926899999 | -1.342599999 |
| Cs | 4.620399998  | 1.729699999  | 1.362699999  |
| Cs | 0.741100000  | 0.569100000  | -3.280599999 |
| Cs | -1.327099999 | 1.211499999  | 2.880599999  |

**Table S7.** Cartesian coordinates for **1H-small** system, optimized at the PBE0/def2-TZVP(Cs)//cc-pVDZ(C,H,O) level of theory.

|    |              |              |              |
|----|--------------|--------------|--------------|
| Cs | 5.293300000  | 0.041400000  | -0.354400000 |
| Cs | -0.117400000 | -2.762800000 | -1.883200000 |
| C  | 3.223400000  | 3.335700000  | -0.198400000 |
| H  | 3.562500000  | 4.310800000  | -0.562700000 |
| C  | 3.400300000  | 3.060900000  | 1.184100000  |
| H  | 3.837000000  | 3.856300000  | 1.800200000  |
| C  | 3.132800000  | 1.785100000  | 1.770800000  |
| C  | 3.541100000  | 1.166000000  | 2.990500000  |
| H  | 3.983400000  | 1.780500000  | 3.783200000  |
| C  | 3.529800000  | -0.239800000 | 3.189900000  |
| H  | 3.973000000  | -0.620300000 | 4.116100000  |
| C  | 3.161300000  | -1.169400000 | 2.149400000  |
| C  | 3.429800000  | -2.556000000 | 1.944100000  |
| H  | 3.890300000  | -3.142800000 | 2.746300000  |
| C  | 3.302700000  | -3.185500000 | 0.658300000  |
| H  | 3.685400000  | -4.207700000 | 0.564000000  |
| C  | 2.891400000  | -2.484800000 | -0.505900000 |
| C  | 3.122500000  | -2.712100000 | -1.912000000 |
| H  | 3.490000000  | -3.691000000 | -2.242600000 |
| C  | 3.009000000  | -1.696900000 | -2.896700000 |
| H  | 3.315200000  | -1.953100000 | -3.916900000 |
| C  | 2.710700000  | -0.312100000 | -2.579500000 |
| C  | 3.022400000  | 0.898900000  | -3.243600000 |
| H  | 3.371000000  | 0.871300000  | -4.281800000 |
| C  | 3.104400000  | 2.174900000  | -2.553900000 |
| H  | 3.496800000  | 3.025700000  | -3.121500000 |
| C  | 2.864400000  | 2.309600000  | -1.160900000 |
| C  | 2.398700000  | 1.113300000  | -0.536000000 |
| C  | 2.530800000  | 0.863700000  | 0.846800000  |
| C  | 2.555800000  | -0.535200000 | 1.028500000  |
| C  | 2.415900000  | -1.157200000 | -0.240500000 |
| C  | 2.325100000  | -0.141000000 | -1.209200000 |
| Cs | 0.114200000  | -1.970100000 | 2.711400000  |
| Cs | -5.293300000 | -0.041400000 | 0.354200000  |
| Cs | 0.117400000  | 2.762500000  | 1.883800000  |
| C  | -3.223500000 | -3.335600000 | 0.198500000  |
| H  | -3.562700000 | -4.310600000 | 0.562800000  |
| C  | -3.400400000 | -3.060900000 | -1.184200000 |
| H  | -3.837000000 | -3.856200000 | -1.800300000 |
| C  | -3.132900000 | -1.785000000 | -1.770800000 |
| C  | -3.541100000 | -1.166000000 | -2.990600000 |
| H  | -3.983300000 | -1.780400000 | -3.783300000 |
| C  | -3.529600000 | 0.239800000  | -3.190100000 |
| H  | -3.972900000 | 0.620200000  | -4.116200000 |
| C  | -3.161300000 | 1.169400000  | -2.149400000 |
| C  | -3.429900000 | 2.556000000  | -1.944200000 |
| H  | -3.890300000 | 3.142800000  | -2.746400000 |
| C  | -3.302700000 | 3.185500000  | -0.658300000 |
| H  | -3.685600000 | 4.207600000  | -0.563900000 |
| C  | -2.891500000 | 2.484700000  | 0.505900000  |
| C  | -3.122500000 | 2.712100000  | 1.912100000  |
| H  | -3.490200000 | 3.690900000  | 2.242500000  |
| C  | -3.009000000 | 1.696900000  | 2.896700000  |
| H  | -3.315100000 | 1.953200000  | 3.916900000  |
| C  | -2.710600000 | 0.312000000  | 2.579600000  |
| C  | -3.022400000 | -0.898900000 | 3.243600000  |
| H  | -3.370900000 | -0.871400000 | 4.281900000  |
| C  | -3.104200000 | -2.174800000 | 2.553900000  |
| H  | -3.496700000 | -3.025600000 | 3.121500000  |
| C  | -2.864400000 | -2.309600000 | 1.160800000  |
| C  | -2.398700000 | -1.113300000 | 0.536000000  |
| C  | -2.530700000 | -0.863700000 | -0.846800000 |
| C  | -2.555600000 | 0.535200000  | -1.028500000 |
| C  | -2.416000000 | 1.157200000  | 0.240500000  |
| C  | -2.325100000 | 0.140900000  | 1.209100000  |
| Cs | -0.114200000 | 1.970400000  | -2.711000000 |



**Table S8.** Cartesian coordinates for **1-full** system, optimized at the PBE0/def2-TZVP(Cs)//cc-pVDZ(C,H,O) level of theory.

|    |              |              |              |
|----|--------------|--------------|--------------|
| Cs | -5.296100000 | 0.191800000  | -1.545500000 |
| Cs | 5.296000000  | -0.191800000 | 1.545500000  |
| Cs | -0.492800000 | 2.422200000  | 1.986800000  |
| Cs | 0.492800000  | -2.422200000 | -1.986800000 |
| O  | -7.537600000 | 2.554100000  | -0.933200000 |
| O  | 7.537600000  | -2.554100000 | 0.933200000  |
| O  | -7.899100000 | -0.079600000 | 0.093400000  |
| O  | 7.899100000  | 0.079600000  | -0.093400000 |
| O  | -7.539500000 | -2.195200000 | -1.778800000 |
| O  | 7.539500000  | 2.195200000  | 1.778800000  |
| O  | -1.793900000 | 4.015800000  | 4.858700000  |
| O  | 1.793800000  | -4.015800000 | -4.858700000 |
| O  | -0.498800000 | 5.501200000  | 2.759400000  |
| O  | 0.498800000  | -5.501200000 | -2.759400000 |
| O  | 0.252700000  | 5.077800000  | 0.100800000  |
| O  | -0.252700000 | -5.077800000 | -0.100800000 |
| C  | -3.228900000 | 3.261700000  | -0.153800000 |
| C  | 3.228900000  | -3.261600000 | 0.153800000  |
| H  | -3.424800000 | 4.286800000  | -0.489200000 |
| H  | 3.424800000  | -4.286900000 | 0.489200000  |
| C  | -3.782600000 | 2.873500000  | 1.128200000  |
| C  | 3.782600000  | -2.873500000 | -1.128200000 |
| H  | -4.355300000 | 3.632200000  | 1.674900000  |
| H  | 4.355300000  | -3.632200000 | -1.675000000 |
| C  | -3.767500000 | 1.531000000  | 1.587200000  |
| C  | 3.767500000  | -1.531000000 | -1.587200000 |
| C  | -4.525500000 | 0.809800000  | 2.591500000  |
| C  | 4.525500000  | -0.809800000 | -2.591600000 |
| H  | -5.136500000 | 1.372900000  | 3.307400000  |
| H  | 5.136500000  | -1.372900000 | -3.307400000 |
| C  | -4.652900000 | -0.596700000 | 2.603000000  |
| C  | 4.652900000  | 0.596800000  | -2.603100000 |
| H  | -5.340900000 | -1.032400000 | 3.337200000  |
| H  | 5.340900000  | 1.032300000  | -3.337100000 |
| C  | -4.031000000 | -1.453600000 | 1.629800000  |
| C  | 4.031000000  | 1.453600000  | -1.629900000 |
| C  | -4.285700000 | -2.776400000 | 1.186100000  |
| C  | 4.285700000  | 2.776400000  | -1.186100000 |
| H  | -4.947700000 | -3.427400000 | 1.770500000  |
| H  | 4.947700000  | 3.427300000  | -1.770500000 |
| C  | -3.806600000 | -3.283100000 | -0.071800000 |
| C  | 3.806600000  | 3.283100000  | 0.071800000  |
| H  | -4.166600000 | -4.272200000 | -0.380200000 |
| H  | 4.166600000  | 4.272200000  | 0.380200000  |
| C  | -3.075000000 | -2.474200000 | -1.013700000 |
| C  | 3.074900000  | 2.474200000  | 1.013700000  |
| C  | 2.875400000  | 2.559300000  | 2.432300000  |
| C  | -2.875400000 | -2.559300000 | -2.432300000 |
| H  | 3.202900000  | 3.453600000  | 2.975200000  |
| H  | -3.203000000 | -3.453600000 | -2.975100000 |
| C  | 2.478000000  | 1.422200000  | 3.228100000  |
| C  | -2.478100000 | -1.422200000 | -3.228200000 |
| H  | 2.517400000  | 1.540700000  | 4.317900000  |
| H  | -2.517500000 | -1.540800000 | -4.317900000 |
| C  | 2.181100000  | 0.149100000  | 2.675000000  |
| C  | -2.181100000 | -0.149100000 | -2.675000000 |
| C  | 2.205100000  | -1.174600000 | 3.243700000  |
| C  | -2.205100000 | 1.174600000  | -3.243700000 |
| H  | 2.198700000  | -1.279600000 | 4.335500000  |
| H  | -2.198700000 | 1.279600000  | -4.335500000 |
| C  | 2.401300000  | -2.355200000 | 2.477000000  |
| C  | -2.401300000 | 2.355100000  | -2.477000000 |
| H  | 2.554100000  | -3.291800000 | 3.029200000  |
| H  | -2.554100000 | 3.291800000  | -3.029200000 |
| C  | -2.618900000 | 2.339300000  | -1.043600000 |
| C  | 2.618900000  | -2.339300000 | 1.043600000  |
| C  | -2.426700000 | 1.038900000  | -0.484400000 |
| C  | 2.426700000  | -1.039000000 | 0.484400000  |
| C  | -3.008500000 | 0.657000000  | 0.757900000  |
| C  | 3.008500000  | -0.657000000 | -0.757900000 |
| C  | -3.138300000 | -0.737100000 | 0.770400000  |

|   |              |              |              |
|---|--------------|--------------|--------------|
| C | 3.138300000  | 0.737100000  | -0.770400000 |
| C | -2.657100000 | -1.228400000 | -0.466300000 |
| C | 2.657100000  | 1.228400000  | 0.466300000  |
| C | 2.202000000  | 0.127600000  | 1.238100000  |
| C | -2.202000000 | -0.127600000 | -1.238100000 |
| C | -6.888200000 | 3.791300000  | -1.123700000 |
| C | 6.888200000  | -3.791300000 | 1.123700000  |
| H | -5.888500000 | 3.803700000  | -0.652400000 |
| H | 5.888500000  | -3.803700000 | 0.652400000  |
| H | -6.777500000 | 3.938100000  | -2.207300000 |
| H | 6.777500000  | -3.938000000 | 2.207400000  |
| H | -7.492700000 | 4.624600000  | -0.713900000 |
| H | 7.492700000  | -4.624600000 | 0.714000000  |
| C | -7.752800000 | 2.274300000  | 0.432700000  |
| C | 7.752800000  | -2.274300000 | -0.432700000 |
| H | -6.790500000 | 2.131400000  | 0.964300000  |
| H | 6.790400000  | -2.131400000 | -0.964300000 |
| H | -8.286000000 | 3.118200000  | 0.916600000  |
| H | 8.286000000  | -3.118200000 | -0.916600000 |
| C | -8.609800000 | 1.041700000  | 0.557100000  |
| C | 8.609800000  | -1.041700000 | -0.557200000 |
| H | -9.539400000 | 1.176700000  | -0.031300000 |
| H | 9.539400000  | -1.176700000 | 0.031300000  |
| H | -8.893400000 | 0.907800000  | 1.620500000  |
| H | 8.893300000  | -0.907800000 | -1.620500000 |
| C | -8.666400000 | -1.258000000 | 0.098600000  |
| C | 8.666400000  | 1.258000000  | -0.098600000 |
| H | -9.003500000 | -1.496300000 | 1.127700000  |
| H | 9.003400000  | 1.496300000  | -1.127700000 |
| H | -9.566700000 | -1.132000000 | -0.535600000 |
| H | 9.566700000  | 1.132000000  | 0.535500000  |
| C | -7.837100000 | -2.405300000 | -0.415800000 |
| C | 7.837100000  | 2.405300000  | 0.415700000  |
| H | -8.421700000 | -3.340100000 | -0.291600000 |
| H | 8.421700000  | 3.340100000  | 0.291600000  |
| H | -6.906400000 | -2.502600000 | 0.178300000  |
| H | 6.906400000  | 2.502600000  | -0.178300000 |
| C | -6.884100000 | -3.305900000 | -2.350200000 |
| C | 6.884200000  | 3.305900000  | 2.350100000  |
| H | -7.527300000 | -4.207500000 | -2.315100000 |
| H | 7.527300000  | 4.207500000  | 2.315000000  |
| H | -6.677200000 | -3.060500000 | -3.400900000 |
| H | 6.677300000  | 3.060500000  | 3.400900000  |
| H | -5.931200000 | -3.522500000 | -1.834200000 |
| H | 5.931200000  | 3.522500000  | 1.834200000  |
| C | -2.793300000 | 3.146900000  | 5.339300000  |
| C | 2.793300000  | -3.146800000 | -5.339300000 |
| H | -3.494900000 | 3.677600000  | 6.012800000  |
| H | 3.494900000  | -3.677600000 | -6.012800000 |
| H | -2.290500000 | 2.356900000  | 5.912200000  |
| H | 2.290400000  | -2.356900000 | -5.912200000 |
| H | -3.367400000 | 2.685300000  | 4.514100000  |
| H | 3.367400000  | -2.685400000 | -4.514200000 |
| C | -2.347700000 | 5.139100000  | 4.219200000  |
| C | 2.347600000  | -5.139100000 | -4.219200000 |
| H | -3.025700000 | 5.679200000  | 4.912500000  |
| H | 3.025600000  | -5.679200000 | -4.912500000 |
| H | -2.938300000 | 4.831700000  | 3.332700000  |
| H | 2.938300000  | -4.831700000 | -3.332700000 |
| C | -1.250900000 | 6.080500000  | 3.797600000  |
| C | 1.250900000  | -6.080500000 | -3.797600000 |
| H | -1.715000000 | 7.026000000  | 3.450200000  |
| H | 1.715000000  | -7.026000000 | -3.450200000 |
| H | -0.602300000 | 6.318100000  | 4.664000000  |
| H | 0.602200000  | -6.318100000 | -4.664000000 |
| C | 0.407600000  | 6.397400000  | 2.169200000  |
| C | -0.407600000 | -6.397400000 | -2.169100000 |
| H | 1.172700000  | 6.737200000  | 2.896900000  |
| H | -1.172700000 | -6.737300000 | -2.896800000 |
| H | -0.132800000 | 7.302300000  | 1.823000000  |
| H | 0.132900000  | -7.302300000 | -1.823000000 |
| C | 1.118200000  | 5.705400000  | 1.022500000  |
| C | -1.118200000 | -5.705400000 | -1.022500000 |
| H | -1.760000000 | -6.452500000 | -0.513200000 |
| H | 1.760000000  | 6.452500000  | 0.513300000  |
| H | 1.764500000  | 4.899500000  | 1.403400000  |
| H | -1.764500000 | -4.899500000 | -1.403300000 |

|    |              |              |              |
|----|--------------|--------------|--------------|
| C  | 0.644100000  | -5.948700000 | 0.547200000  |
| C  | -0.644100000 | 5.948700000  | -0.547200000 |
| H  | -1.386500000 | 6.372100000  | 0.151400000  |
| H  | 1.386500000  | -6.372100000 | -0.151400000 |
| H  | 1.187200000  | -5.349100000 | 1.290100000  |
| H  | -1.187200000 | 5.349200000  | -1.290100000 |
| H  | 0.105200000  | -6.765700000 | 1.062500000  |
| H  | -0.105200000 | 6.765800000  | -1.062500000 |
| Cs | -1.005000000 | -2.783500000 | 2.137000000  |
| Cs | 1.005000000  | 2.783500000  | -2.137000000 |
| O  | -1.719800000 | -5.801900000 | 2.987200000  |
| O  | 1.719900000  | 5.801900000  | -2.987100000 |
| O  | -0.837100000 | -4.399600000 | 5.264400000  |
| O  | 0.837100000  | 4.399700000  | -5.264300000 |
| O  | -1.174100000 | -1.654700000 | 5.015400000  |
| O  | 1.174100000  | 1.654700000  | -5.015400000 |
| C  | -2.868100000 | -6.358600000 | 2.396400000  |
| C  | 2.868100000  | 6.358600000  | -2.396400000 |
| H  | -3.726700000 | -6.340800000 | 3.093900000  |
| H  | 3.726700000  | 6.340800000  | -3.093900000 |
| H  | -3.112000000 | -5.743000000 | 1.519200000  |
| H  | 3.112000000  | 5.743000000  | -1.519100000 |
| H  | -2.694600000 | -7.406400000 | 2.080100000  |
| H  | 2.694700000  | 7.406400000  | -2.080100000 |
| C  | -1.354500000 | -6.435000000 | 4.187000000  |
| C  | 1.354600000  | 6.435000000  | -4.187000000 |
| H  | -2.228800000 | -6.515900000 | 4.862500000  |
| H  | 2.228800000  | 6.515900000  | -4.862500000 |
| H  | -0.977500000 | -7.460400000 | 3.993700000  |
| H  | 0.977600000  | 7.460500000  | -3.993700000 |
| C  | -0.279000000 | -5.622800000 | 4.862000000  |
| C  | 0.279000000  | 5.622800000  | -4.862000000 |
| H  | 0.564300000  | -5.459600000 | 4.159800000  |
| H  | -0.564200000 | 5.459600000  | -4.159800000 |
| H  | 0.115300000  | -6.188100000 | 5.731500000  |
| H  | -0.115300000 | 6.188100000  | -5.731500000 |
| C  | 0.104300000  | -3.497400000 | 5.795000000  |
| C  | -0.104300000 | 3.497500000  | -5.795000000 |
| H  | 0.588100000  | -3.916400000 | 6.701100000  |
| H  | -0.588100000 | 3.916500000  | -6.701100000 |
| H  | 0.898300000  | -3.284100000 | 5.052300000  |
| H  | -0.898300000 | 3.284100000  | -5.052300000 |
| C  | -0.605100000 | -2.220100000 | 6.166000000  |
| C  | 0.605100000  | 2.220100000  | -6.166000000 |
| H  | 0.128900000  | -1.527700000 | 6.626200000  |
| H  | -0.128900000 | 1.527800000  | -6.626100000 |
| H  | -1.391600000 | -2.432400000 | 6.918400000  |
| H  | 1.391500000  | 2.432400000  | -6.918400000 |
| C  | -1.825800000 | -0.434700000 | 5.269400000  |
| C  | 1.825700000  | 0.434700000  | -5.269300000 |
| H  | -1.100900000 | 0.346700000  | 5.569500000  |
| H  | 1.100800000  | -0.346700000 | -5.569500000 |
| H  | -2.344800000 | -0.131000000 | 4.348000000  |
| H  | 2.344800000  | 0.131000000  | -4.347900000 |
| H  | -2.583100000 | -0.543400000 | 6.069900000  |
| H  | 2.583000000  | 0.543300000  | -6.069800000 |

**Table S9.** Cartesian coordinates for **1H-full** system, optimized at the PBE0/def2-TZVP(Cs)//cc-pVDZ(C,H,O) level of theory.

|    |              |              |              |
|----|--------------|--------------|--------------|
| Cs | 5.229041342  | -0.077637756 | 1.649744011  |
| Cs | -0.617790374 | 2.486193422  | 2.107884411  |
| O  | 7.624645400  | -2.318698620 | 0.908430134  |
| O  | 7.611308755  | 0.133960601  | -0.277981528 |
| O  | 7.748973801  | 2.105305785  | 1.542894653  |
| O  | -2.140112765 | 3.892351450  | 4.762827726  |
| O  | -0.493534002 | 5.436745582  | 2.941294647  |
| O  | 0.309239866  | 4.967563509  | 0.319014051  |
| C  | 3.406490518  | -3.458906122 | 0.045315138  |
| H  | 3.643070826  | -4.495868702 | 0.330365659  |
| C  | 3.934989695  | -2.985821201 | -1.196844868 |
| H  | 4.542354415  | -3.691800226 | -1.786196082 |

|    |              |              |              |
|----|--------------|--------------|--------------|
| C  | 3.849828287  | -1.624241291 | -1.595714081 |
| C  | 4.620329719  | -0.825642969 | -2.493791601 |
| H  | 5.299921385  | -1.323303690 | -3.205643558 |
| C  | 4.673396876  | 0.589597594  | -2.446384620 |
| H  | 5.379312230  | 1.099328456  | -3.119248668 |
| C  | 3.950121941  | 1.357352447  | -1.467473589 |
| C  | 4.107910390  | 2.684883887  | -0.968936351 |
| H  | 4.761575380  | 3.387399522  | -1.508758443 |
| C  | 3.601893861  | 3.094125700  | 0.313073406  |
| H  | 3.942451869  | 4.068018182  | 0.702482429  |
| C  | 2.847132952  | 2.236365869  | 1.158624015  |
| C  | 2.652022637  | 2.232837585  | 2.583102378  |
| H  | 2.917848641  | 3.128684341  | 3.168550321  |
| C  | 2.301626478  | 1.060507095  | 3.318901365  |
| H  | 2.322731162  | 1.128333233  | 4.417941939  |
| C  | 2.129305089  | -0.220979303 | 2.700560363  |
| C  | 2.337187439  | -1.529050757 | 3.230163432  |
| H  | 2.440888466  | -1.638412785 | 4.321217447  |
| C  | 2.620897778  | -2.679173973 | 2.424433651  |
| H  | 2.911591294  | -3.606888340 | 2.942513897  |
| C  | 2.762281316  | -2.600064300 | 0.997198015  |
| C  | 2.472524520  | -1.302052128 | 0.482756956  |
| C  | 3.020875973  | -0.826880976 | -0.724218547 |
| C  | 3.042649164  | 0.573715420  | -0.699528673 |
| C  | 2.487126502  | 0.988602394  | 0.541754426  |
| C  | 2.137285106  | -0.182760792 | 1.282259046  |
| C  | 6.962513681  | -3.455279687 | 1.463015062  |
| H  | 5.874808345  | -3.454465242 | 1.233163444  |
| H  | 7.110853082  | -3.419705954 | 2.555320920  |
| H  | 7.396166585  | -4.405228618 | 1.078841585  |
| C  | 7.431696274  | -2.206359311 | -0.492592449 |
| H  | 6.349394719  | -2.150887299 | -0.743255935 |
| H  | 7.844940072  | -3.097293785 | -1.022966898 |
| C  | 8.141830223  | -0.983223975 | -0.969755469 |
| H  | 9.235769958  | -1.066288149 | -0.773497694 |
| H  | 7.994719173  | -0.881090805 | -2.068720206 |
| C  | 8.224518678  | 1.358953484  | -0.664537313 |
| H  | 8.054114437  | 1.574579345  | -1.743166540 |
| H  | 9.322899675  | 1.302661074  | -0.488991360 |
| C  | 7.609755021  | 2.451922689  | 0.168674320  |
| H  | 8.125247576  | 3.415576447  | -0.052043970 |
| H  | 6.534091955  | 2.575414995  | -0.094558946 |
| C  | 7.257506710  | 3.118888756  | 2.406231807  |
| H  | 7.835403064  | 4.064445662  | 2.303740012  |
| H  | 7.365692433  | 2.754466739  | 3.441720161  |
| H  | 6.186604119  | 3.345409292  | 2.208827225  |
| C  | -3.353960481 | 3.238341594  | 5.108231835  |
| H  | -3.905103717 | 3.806861692  | 5.889680550  |
| H  | -3.102016620 | 2.246294492  | 5.510602206  |
| H  | -4.008242500 | 3.104672508  | 4.224354686  |
| C  | -2.411732670 | 5.219258123  | 4.324124214  |
| H  | -2.998758865 | 5.761315098  | 5.102213127  |
| H  | -3.021568591 | 5.202597748  | 3.392689617  |
| C  | -1.146525185 | 5.951526008  | 4.089053574  |
| H  | -1.391610217 | 7.027262081  | 3.935424644  |
| H  | -0.482313746 | 5.885633383  | 4.979752808  |
| C  | 0.443885767  | 6.323578729  | 2.376834449  |
| H  | 1.207133975  | 6.647632116  | 3.121638004  |
| H  | -0.071327618 | 7.247417288  | 2.023736456  |
| C  | 1.165541514  | 5.613467478  | 1.248353777  |
| H  | 1.824458811  | 6.350221282  | 0.735999722  |
| H  | 1.808323076  | 4.808946017  | 1.647312986  |
| C  | -0.598502704 | 5.852029893  | -0.342844211 |
| H  | -1.334416409 | 6.286928628  | 0.360514377  |
| H  | -1.150595305 | 5.249295269  | -1.082007012 |
| H  | -0.053166024 | 6.667487574  | -0.863091565 |
| Cs | 0.670043342  | 2.503344322  | -1.870518542 |
| Cs | -0.669983986 | -2.503342506 | 1.870515488  |
| Cs | 0.617849729  | -2.486191605 | -2.107887467 |
| C  | -3.406431163 | 3.458907939  | -0.045318192 |
| C  | -3.934930342 | 2.985823018  | 1.196841815  |
| C  | -3.849768933 | 1.624243114  | 1.595711031  |
| C  | -2.472465163 | 1.302053945  | -0.482760011 |
| C  | -3.020816842 | 0.826883084  | 0.724214564  |
| O  | 1.674327647  | 5.295559265  | -2.841238122 |
| O  | 0.869156993  | 3.898137363  | -5.037188949 |
| O  | 1.250344411  | 1.257876503  | -4.713982997 |

|    |              |              |              |
|----|--------------|--------------|--------------|
| C  | 2.650051903  | 6.027850074  | -2.099947537 |
| H  | 3.515514789  | 6.303750299  | -2.739198902 |
| H  | 2.998232987  | 5.366708124  | -1.290278364 |
| H  | 2.220599786  | 6.961513037  | -1.672756372 |
| C  | 1.246427370  | 5.983632424  | -4.005785434 |
| H  | 2.116547740  | 6.189651691  | -4.669669884 |
| H  | 0.782208698  | 6.964425940  | -3.747210955 |
| C  | 0.248675538  | 5.131300262  | -4.717161582 |
| H  | -0.643249098 | 4.958794581  | -4.069966424 |
| H  | -0.104259402 | 5.662370881  | -5.632382365 |
| C  | -0.003796055 | 3.008010949  | -5.723983828 |
| H  | -0.336220518 | 3.434004738  | -6.699047954 |
| H  | -0.904040799 | 2.803932513  | -5.106268022 |
| C  | 0.754776362  | 1.729641025  | -5.962925535 |
| H  | 0.077314374  | 0.982387714  | -6.435751880 |
| H  | 1.604613082  | 1.908789938  | -6.660509045 |
| C  | 1.921097549  | 0.013153876  | -4.836446200 |
| H  | 1.211458585  | -0.806975556 | -5.086119235 |
| H  | 2.436324806  | -0.192623734 | -3.881864037 |
| H  | 2.699761603  | 0.057160818  | -5.629104129 |
| C  | -2.129245732 | 0.220981119  | -2.700563417 |
| C  | -2.337128082 | 1.529052571  | -3.230166485 |
| C  | -2.620838422 | 2.679175787  | -2.424436704 |
| C  | -2.762221958 | 2.600066115  | -0.997201071 |
| C  | -2.137225749 | 0.182762608  | -1.282262100 |
| Cs | -5.228981985 | 0.077639572  | -1.649747066 |
| O  | -7.624586029 | 2.318700422  | -0.908433190 |
| O  | -7.611249395 | -0.133958787 | 0.277978471  |
| O  | -7.748914651 | -2.105303663 | -1.542898639 |
| O  | 2.140172125  | -3.892349635 | -4.762830798 |
| O  | 0.493593355  | -5.436743767 | -2.941297704 |
| O  | -0.309180511 | -4.967561690 | -0.319017105 |
| H  | -3.643696612 | 4.495676299  | -0.330501253 |
| H  | -4.543101016 | 3.691582993  | 1.785630958  |
| C  | -4.620270355 | 0.825644805  | 2.493788550  |
| H  | -5.300048584 | 1.323374856  | 3.205407630  |
| C  | -4.673337507 | -0.589595798 | 2.446381562  |
| H  | -5.379801180 | -1.099325277 | 3.118675149  |
| C  | -3.950062583 | -1.357350632 | 1.467470537  |
| C  | -4.107851034 | -2.684882071 | 0.968933297  |
| H  | -4.761723781 | -3.387305119 | 1.508628075  |
| C  | -3.601834506 | -3.094123885 | -0.313076459 |
| H  | -3.943150324 | -4.067546578 | -0.702992840 |
| C  | -2.847073597 | -2.236364051 | -1.158627069 |
| C  | -2.651963282 | -2.232835768 | -2.583105433 |
| H  | -2.918111393 | -3.128580766 | -3.168567582 |
| C  | -2.301567121 | -1.060505278 | -3.318904419 |
| H  | -2.322367890 | -1.128311568 | -4.417950776 |
| H  | -2.440485049 | 1.638540735  | -4.321234729 |
| H  | -2.912934268 | 3.606408967  | -2.942587152 |
| C  | -3.042589806 | -0.573713604 | 0.699525620  |
| C  | -2.487067145 | -0.988600577 | -0.541757479 |
| C  | -6.962454325 | 3.455281508  | -1.463018116 |
| H  | -5.873257497 | 3.450032677  | -1.240396524 |
| H  | -7.118902181 | 3.425491415  | -2.554314380 |
| H  | -7.390179928 | 4.404651088  | -1.070842996 |
| C  | -7.431636924 | 2.206361124  | 0.492589401  |
| H  | -6.349336506 | 2.150595568  | 0.743292723  |
| H  | -7.844572097 | 3.097593751  | 1.022691708  |
| C  | -8.141770859 | 0.983225771  | 0.969752405  |
| H  | -9.235709718 | 1.066282113  | 0.773466106  |
| H  | -7.994705058 | 0.881076464  | 2.068718313  |
| C  | -8.224459317 | -1.358951639 | 0.664534252  |
| H  | -8.054265162 | -1.574524625 | 1.743204761  |
| H  | -9.322840154 | -1.302643866 | 0.488915069  |
| C  | -7.609695670 | -2.451920873 | -0.168677375 |
| H  | -8.125184324 | -3.415630142 | 0.051751409  |
| H  | -6.534080441 | -2.575477990 | 0.094735802  |
| C  | -7.257447364 | -3.118886947 | -2.406234860 |
| H  | -7.829021521 | -4.067492385 | -2.296522072 |
| H  | -7.375243406 | -2.758689692 | -3.442143491 |
| H  | -6.183998322 | -3.338999604 | -2.215440548 |
| C  | 3.354019846  | -3.238339763 | -5.108234883 |
| H  | 3.909094003  | -3.810853248 | -5.883930664 |
| H  | 3.101587335  | -2.249490059 | -5.518263686 |
| H  | 4.004910535  | -3.097076830 | -4.223024142 |
| C  | 2.411792022  | -5.219256303 | -4.324127272 |

|   |              |              |              |
|---|--------------|--------------|--------------|
| H | 2.998995127  | -5.761241637 | -5.102095289 |
| H | 3.021290918  | -5.202687326 | -3.392461313 |
| C | 1.146584539  | -5.951524186 | -4.089056636 |
| H | 1.391593121  | -7.027286941 | -3.935549482 |
| H | 0.482336050  | -5.885486533 | -4.979731160 |
| C | -0.443826412 | -6.323576912 | -2.376837510 |
| H | -1.207091995 | -6.647621988 | -3.121630252 |
| H | 0.071390484  | -7.247434396 | -2.023787153 |
| C | -1.165482159 | -5.613465664 | -1.248356834 |
| H | -1.824231782 | -6.350392925 | -0.736039501 |
| H | -1.808341504 | -4.809044152 | -1.647386576 |
| C | 0.598562060  | -5.852028075 | 0.342841152  |
| H | 1.334354432  | -6.287339612 | -0.360375670 |
| H | 1.150548028  | -5.249177756 | 1.081974849  |
| H | 0.053137336  | -6.667353930 | 0.863237822  |
| O | -1.674268292 | -5.295557449 | 2.841235064  |
| O | -0.869097638 | -3.898135552 | 5.037185896  |
| O | -1.250285054 | -1.257874688 | 4.713979946  |
| C | -2.649992548 | -6.027848262 | 2.099944482  |
| H | -3.515346191 | -6.303526458 | 2.739442688  |
| H | -2.998420244 | -5.366588676 | 1.290466792  |
| H | -2.220659051 | -6.961463010 | 1.672573595  |
| C | -1.246368012 | -5.983630605 | 4.005782376  |
| H | -2.116494456 | -6.189644101 | 4.669663924  |
| H | -0.782147095 | -6.964425202 | 3.747224087  |
| C | -0.248616181 | -5.131298450 | 4.717158527  |
| H | 0.643309952  | -4.958805579 | 4.069964114  |
| H | 0.104333010  | -5.662366227 | 5.632377095  |
| C | 0.003855411  | -3.008009136 | 5.723980769  |
| H | 0.336117937  | -3.434061583 | 6.699079990  |
| H | 0.904190858  | -2.803990385 | 5.106378239  |
| C | -0.754717004 | -1.729639211 | 5.962922488  |
| H | -0.077154517 | -0.982469951 | 6.435743348  |
| H | -1.604364280 | -1.908865898 | 6.660707599  |
| C | -1.921038197 | -0.013152058 | 4.836443147  |
| H | -1.210548519 | 0.808003131  | 5.080265187  |
| H | -2.441345114 | 0.189548400  | 3.883914953  |
| H | -2.695349768 | -0.055266861 | 5.633459395  |

**Table S10.** Cartesian coordinates for “naked” trianion  $C_{20}H_{10}^{3-}$ , optimized at the PBE0/cc-pVDZ level of theory.

|   |              |              |              |
|---|--------------|--------------|--------------|
| C | -3.265015562 | 0.235658907  | 0.720595975  |
| C | -1.702839165 | 0.239717050  | -2.869905617 |
| C | 2.225304702  | 0.227635818  | -2.493165641 |
| C | 3.066918203  | 0.243604498  | 1.322069513  |
| C | -0.325119872 | 0.230639008  | 3.321121380  |
| H | -4.214864304 | 0.508394695  | 1.215960021  |
| H | -2.466743225 | 0.547506396  | -3.606190104 |
| H | 2.699121969  | 0.505222477  | -3.451713977 |
| H | 4.122522033  | 0.533658823  | 1.475711385  |
| H | -0.140462667 | 0.530425700  | 4.367842704  |
| C | -2.073693736 | 0.017338442  | -1.515605622 |
| C | 0.786318393  | 0.019107786  | -2.441776288 |
| C | 2.583438882  | 0.009444633  | 0.003397766  |
| C | 0.789490813  | 0.021649954  | 2.432666782  |
| C | -2.085616106 | 0.010385502  | 1.521130559  |
| C | -0.973298443 | -0.344393466 | -0.694682545 |
| C | 0.377699884  | -0.341837798 | -1.132940328 |
| C | 1.201337094  | -0.352061348 | -0.005224989 |
| C | 0.368825595  | -0.337452829 | 1.131483121  |
| C | -0.975809337 | -0.352078037 | 0.699905312  |
| C | -3.266469277 | 0.228211803  | -0.710013059 |
| C | -0.311371997 | 0.238063347  | -3.322343825 |
| C | 3.065827335  | 0.237776284  | -1.333238275 |
| C | 2.217904604  | 0.228999260  | 2.494108845  |
| C | -1.704874197 | 0.244219829  | 2.870841615  |
| H | -4.214523117 | 0.502915166  | -1.206513780 |
| H | -0.125689077 | 0.546673114  | -4.366559076 |
| H | 4.125056646  | 0.512314509  | -1.490582498 |
| H | 2.685181410  | 0.524348416  | 3.450073961  |
| H | -2.468557480 | 0.538825057  | 3.613544678  |

**Table S11.** Cartesian coordinates for neutral C<sub>20</sub>H<sub>10</sub>, optimized at the PBE0/cc-pVDZ level of theory.

|   |              |              |              |
|---|--------------|--------------|--------------|
| C | -3.209723411 | 0.253124867  | 0.698625151  |
| C | -1.661468844 | 0.291317307  | -2.808774635 |
| C | 2.191967488  | 0.254550867  | -2.441317888 |
| C | 3.004107163  | 0.275987225  | 1.300290667  |
| C | -0.325275676 | 0.277394691  | 3.251477159  |
| H | -4.120810974 | 0.586604390  | 1.209142910  |
| H | -2.422914522 | 0.677201734  | -3.494695670 |
| H | 2.624557273  | 0.592031173  | -3.389403051 |
| H | 4.030824922  | 0.641626936  | 1.415412809  |
| H | -0.112461853 | 0.648111131  | 4.259378665  |
| C | -2.021240707 | -0.052249624 | -1.477159524 |
| C | 0.766283172  | -0.049102069 | -2.378785023 |
| C | 2.521536553  | -0.068714640 | 0.003582705  |
| C | 0.768637037  | -0.043425260 | 2.368487576  |
| C | -2.034810038 | -0.066015912 | 1.484737381  |
| C | -0.976033088 | -0.550202178 | -0.697129172 |
| C | 0.378453573  | -0.547538675 | -1.136147411 |
| C | 1.206915877  | -0.561492273 | -0.004717277 |
| C | 0.369911900  | -0.542120630 | 1.134238199  |
| C | -0.979628587 | -0.559959318 | 0.703197836  |
| C | -3.210290204 | 0.251922050  | -0.687653835 |
| C | -0.309637393 | 0.290756977  | -3.248277504 |
| C | 3.007712036  | 0.256589923  | -1.316904656 |
| C | 2.179184907  | 0.271906005  | 2.438640987  |
| C | -1.666394046 | 0.281168357  | 2.814071481  |
| H | -4.119841223 | 0.584873643  | -1.199809496 |
| H | -0.096155622 | 0.676265746  | -4.250641498 |
| H | 4.043344352  | 0.595258350  | -1.438469412 |
| H | 2.601796470  | 0.635551153  | 3.380889950  |
| H | -2.428546536 | 0.653491052  | 3.507710570  |

**Table S12.** NBO charges for 1-small model (PBE0/def2-TZVP(Cs)//cc-pvDZ(C,H,O)).

| Atom No | Natural Charge | Natural Population |         |         |          | Natural Spin Density |
|---------|----------------|--------------------|---------|---------|----------|----------------------|
|         |                | Core               | Valence | Rydberg | Total    |                      |
| Cs 1    | 0.96110        | 53.99240           | 0.01210 | 0.03440 | 54.03890 | 0.00173              |
| Cs 2    | 0.92064        | 53.98568           | 0.03767 | 0.05601 | 54.07936 | 0.01347              |
| C 3     | -0.36674       | 1.99900            | 4.34522 | 0.02253 | 6.36674  | 0.03629              |
| H 4     | 0.22893        | 0.00000            | 0.76784 | 0.00323 | 0.77107  | 0.00020              |
| C 5     | -0.31241       | 1.99898            | 4.29228 | 0.02114 | 6.31241  | 0.09691              |
| H 6     | 0.22853        | 0.00000            | 0.76810 | 0.00336 | 0.77147  | 0.00014              |
| C 7     | -0.21280       | 1.99879            | 4.19095 | 0.02306 | 6.21280  | 0.00295              |
| C 8     | -0.27897       | 1.99898            | 4.26030 | 0.01969 | 6.27897  | 0.09089              |
| H 9     | 0.22641        | 0.00000            | 0.77028 | 0.00331 | 0.77359  | 0.00006              |
| C 10    | -0.35623       | 1.99899            | 4.33585 | 0.02139 | 6.35623  | 0.01911              |
| H 11    | 0.22703        | 0.00000            | 0.76972 | 0.00325 | 0.77297  | 0.00015              |
| C 12    | -0.14253       | 1.99878            | 4.12185 | 0.02190 | 6.14253  | 0.07686              |
| C 13    | -0.38724       | 1.99899            | 4.36545 | 0.02280 | 6.38724  | 0.00272              |
| H 14    | 0.22756        | 0.00000            | 0.76910 | 0.00333 | 0.77244  | 0.00009              |
| C 15    | -0.31320       | 1.99898            | 4.29364 | 0.02058 | 6.31320  | 0.06730              |
| H 16    | 0.22685        | 0.00000            | 0.76988 | 0.00327 | 0.77315  | 0.00003              |
| C 17    | -0.17848       | 1.99878            | 4.15739 | 0.02231 | 6.17848  | 0.02482              |
| C 18    | -0.34941       | 1.99900            | 4.32781 | 0.02260 | 6.34941  | 0.12171              |
| H 19    | 0.22998        | 0.00000            | 0.76656 | 0.00345 | 0.77002  | 0.00019              |
| C 20    | -0.35265       | 1.99900            | 4.33077 | 0.02289 | 6.35265  | 0.11664              |
| H 21    | 0.22993        | 0.00000            | 0.76671 | 0.00336 | 0.77007  | 0.00017              |
| C 22    | -0.14703       | 1.99877            | 4.12694 | 0.02131 | 6.14703  | 0.03392              |
| C 23    | -0.37640       | 1.99898            | 4.35432 | 0.02310 | 6.37640  | 0.05215              |
| H 24    | 0.22944        | 0.00000            | 0.76727 | 0.00330 | 0.77056  | 0.00008              |
| C 25    | -0.41714       | 1.99899            | 4.39390 | 0.02424 | 6.41714  | 0.00663              |
| H 26    | 0.22987        | 0.00000            | 0.76673 | 0.00340 | 0.77013  | 0.00004              |
| C 27    | -0.13245       | 1.99877            | 4.11223 | 0.02144 | 6.13245  | 0.06488              |
| C 28    | -0.14343       | 1.99874            | 4.12353 | 0.02116 | 6.14343  | 0.05358              |

|           |          |           |           |         |           |         |
|-----------|----------|-----------|-----------|---------|-----------|---------|
| C 29      | -0.17325 | 1.99873   | 4.15201   | 0.02251 | 6.17325   | 0.00216 |
| C 30      | -0.13338 | 1.99874   | 4.11367   | 0.02096 | 6.13338   | 0.05287 |
| C 31      | -0.16042 | 1.99873   | 4.13991   | 0.02177 | 6.16042   | 0.01987 |
| C 32      | -0.15830 | 1.99873   | 4.13819   | 0.02138 | 6.15830   | 0.02736 |
| Cs 33     | 0.92618  | 53.98663  | 0.03178   | 0.05542 | 54.07382  | 0.01403 |
| Cs 34     | 0.96110  | 53.99240  | 0.01211   | 0.03439 | 54.03890  | 0.00172 |
| Cs 35     | 0.92063  | 53.98568  | 0.03767   | 0.05602 | 54.07937  | 0.01348 |
| C 36      | -0.36686 | 1.99900   | 4.34534   | 0.02253 | 6.36686   | 0.03605 |
| H 37      | 0.22892  | 0.00000   | 0.76785   | 0.00323 | 0.77108   | 0.00020 |
| C 38      | -0.31242 | 1.99898   | 4.29230   | 0.02114 | 6.31242   | 0.09683 |
| H 39      | 0.22853  | 0.00000   | 0.76810   | 0.00336 | 0.77147   | 0.00014 |
| C 40      | -0.21277 | 1.99879   | 4.19092   | 0.02306 | 6.21277   | 0.00293 |
| C 41      | -0.27892 | 1.99898   | 4.26025   | 0.01969 | 6.27892   | 0.09098 |
| H 42      | 0.22641  | 0.00000   | 0.77028   | 0.00331 | 0.77359   | 0.00006 |
| C 43      | -0.35614 | 1.99899   | 4.33576   | 0.02138 | 6.35614   | 0.01927 |
| H 44      | 0.22704  | 0.00000   | 0.76971   | 0.00325 | 0.77296   | 0.00015 |
| C 45      | -0.14256 | 1.99878   | 4.12188   | 0.02190 | 6.14256   | 0.07679 |
| C 46      | -0.38720 | 1.99899   | 4.36541   | 0.02280 | 6.38720   | 0.00274 |
| H 47      | 0.22757  | 0.00000   | 0.76909   | 0.00333 | 0.77243   | 0.00009 |
| C 48      | -0.31337 | 1.99898   | 4.29381   | 0.02058 | 6.31337   | 0.06709 |
| H 49      | 0.22685  | 0.00000   | 0.76988   | 0.00327 | 0.77315   | 0.00003 |
| C 50      | -0.17833 | 1.99878   | 4.15725   | 0.02230 | 6.17833   | 0.02495 |
| C 51      | -0.34957 | 1.99900   | 4.32796   | 0.02261 | 6.34957   | 0.12161 |
| H 52      | 0.22999  | 0.00000   | 0.76655   | 0.00345 | 0.77001   | 0.00019 |
| C 53      | -0.35249 | 1.99900   | 4.33061   | 0.02288 | 6.35249   | 0.11686 |
| H 54      | 0.22992  | 0.00000   | 0.76672   | 0.00336 | 0.77008   | 0.00017 |
| C 55      | -0.14720 | 1.99877   | 4.12711   | 0.02132 | 6.14720   | 0.03379 |
| C 56      | -0.37618 | 1.99898   | 4.35410   | 0.02310 | 6.37618   | 0.05238 |
| H 57      | 0.22944  | 0.00000   | 0.76726   | 0.00330 | 0.77056   | 0.00008 |
| C 58      | -0.41729 | 1.99899   | 4.39404   | 0.02425 | 6.41729   | 0.00656 |
| H 59      | 0.22987  | 0.00000   | 0.76673   | 0.00340 | 0.77013   | 0.00004 |
| C 60      | -0.13233 | 1.99877   | 4.11212   | 0.02144 | 6.13233   | 0.06499 |
| C 61      | -0.14335 | 1.99874   | 4.12346   | 0.02116 | 6.14335   | 0.05366 |
| C 62      | -0.17328 | 1.99873   | 4.15203   | 0.02251 | 6.17328   | 0.00214 |
| C 63      | -0.13343 | 1.99874   | 4.11372   | 0.02097 | 6.13343   | 0.05282 |
| C 64      | -0.16033 | 1.99873   | 4.13983   | 0.02177 | 6.16033   | 0.01998 |
| C 65      | -0.15840 | 1.99873   | 4.13828   | 0.02138 | 6.15840   | 0.02723 |
| Cs 66     | 0.92617  | 53.98663  | 0.03179   | 0.05541 | 54.07383  | 0.01402 |
| =====     |          |           |           |         |           |         |
| * Total * | 0.00000  | 403.88436 | 184.87989 | 1.23575 | 590.00000 | 2.00000 |

**Table S13.** NBO charges for 1-small model (PBE0/def2-TZVP(Cs)//cc-pvDZ(C,H,O)).

| Atom No | Natural Charge | Natural Population |         |         |          | Natural Spin Density |
|---------|----------------|--------------------|---------|---------|----------|----------------------|
|         |                | Core               | Valence | Rydberg | Total    |                      |
| Cs 1    | 0.96110        | 53.99240           | 0.01210 | 0.03440 | 54.03890 | 0.00173              |
| Cs 2    | 0.92064        | 53.98568           | 0.03767 | 0.05601 | 54.07936 | 0.01347              |
| C 3     | -0.36674       | 1.99900            | 4.34522 | 0.02253 | 6.36674  | 0.03629              |
| H 4     | 0.22893        | 0.00000            | 0.76784 | 0.00323 | 0.77107  | 0.00020              |
| C 5     | -0.31241       | 1.99898            | 4.29228 | 0.02114 | 6.31241  | 0.09691              |
| H 6     | 0.22853        | 0.00000            | 0.76810 | 0.00336 | 0.77147  | 0.00014              |
| C 7     | -0.21280       | 1.99879            | 4.19095 | 0.02306 | 6.21280  | 0.00295              |
| C 8     | -0.27897       | 1.99898            | 4.26030 | 0.01969 | 6.27897  | 0.09089              |
| H 9     | 0.22641        | 0.00000            | 0.77028 | 0.00331 | 0.77359  | 0.00006              |
| C 10    | -0.35623       | 1.99899            | 4.33585 | 0.02139 | 6.35623  | 0.01911              |
| H 11    | 0.22703        | 0.00000            | 0.76972 | 0.00325 | 0.77297  | 0.00015              |
| C 12    | -0.14253       | 1.99878            | 4.12185 | 0.02190 | 6.14253  | 0.07686              |
| C 13    | -0.38724       | 1.99899            | 4.36545 | 0.02280 | 6.38724  | 0.00272              |
| H 14    | 0.22756        | 0.00000            | 0.76910 | 0.00333 | 0.77244  | 0.00009              |
| C 15    | -0.31320       | 1.99898            | 4.29364 | 0.02058 | 6.31320  | 0.06730              |
| H 16    | 0.22685        | 0.00000            | 0.76988 | 0.00327 | 0.77315  | 0.00003              |
| C 17    | -0.17848       | 1.99878            | 4.15739 | 0.02231 | 6.17848  | 0.02482              |
| C 18    | -0.34941       | 1.99900            | 4.32781 | 0.02260 | 6.34941  | 0.12171              |
| H 19    | 0.22998        | 0.00000            | 0.76656 | 0.00345 | 0.77002  | 0.00019              |
| C 20    | -0.35265       | 1.99900            | 4.33077 | 0.02289 | 6.35265  | 0.11664              |
| H 21    | 0.22993        | 0.00000            | 0.76671 | 0.00336 | 0.77007  | 0.00017              |
| C 22    | -0.14703       | 1.99877            | 4.12694 | 0.02131 | 6.14703  | 0.03392              |
| C 23    | -0.37640       | 1.99898            | 4.35432 | 0.02310 | 6.37640  | 0.05215              |
| H 24    | 0.22944        | 0.00000            | 0.76727 | 0.00330 | 0.77056  | 0.00008              |
| C 25    | -0.41714       | 1.99899            | 4.39390 | 0.02424 | 6.41714  | 0.00663              |
| H 26    | 0.22987        | 0.00000            | 0.76673 | 0.00340 | 0.77013  | 0.00004              |



|           |          |           |           |         |           |         |
|-----------|----------|-----------|-----------|---------|-----------|---------|
| C 27      | -0.13245 | 1.99877   | 4.11223   | 0.02144 | 6.13245   | 0.06488 |
| C 28      | -0.14343 | 1.99874   | 4.12353   | 0.02116 | 6.14343   | 0.05358 |
| C 29      | -0.17325 | 1.99873   | 4.15201   | 0.02251 | 6.17325   | 0.00216 |
| C 30      | -0.13338 | 1.99874   | 4.11367   | 0.02096 | 6.13338   | 0.05287 |
| C 31      | -0.16042 | 1.99873   | 4.13991   | 0.02177 | 6.16042   | 0.01987 |
| C 32      | -0.15830 | 1.99873   | 4.13819   | 0.02138 | 6.15830   | 0.02736 |
| Cs 33     | 0.92618  | 53.98663  | 0.03178   | 0.05542 | 54.07382  | 0.01403 |
| Cs 34     | 0.96110  | 53.99240  | 0.01211   | 0.03439 | 54.03890  | 0.00172 |
| Cs 35     | 0.92063  | 53.98568  | 0.03767   | 0.05602 | 54.07937  | 0.01348 |
| C 36      | -0.36686 | 1.99900   | 4.34534   | 0.02253 | 6.36686   | 0.03605 |
| H 37      | 0.22892  | 0.00000   | 0.76785   | 0.00323 | 0.77108   | 0.00020 |
| C 38      | -0.31242 | 1.99898   | 4.29230   | 0.02114 | 6.31242   | 0.09683 |
| H 39      | 0.22853  | 0.00000   | 0.76810   | 0.00336 | 0.77147   | 0.00014 |
| C 40      | -0.21277 | 1.99879   | 4.19092   | 0.02306 | 6.21277   | 0.00293 |
| C 41      | -0.27892 | 1.99898   | 4.26025   | 0.01969 | 6.27892   | 0.09098 |
| H 42      | 0.22641  | 0.00000   | 0.77028   | 0.00331 | 0.77359   | 0.00006 |
| C 43      | -0.35614 | 1.99899   | 4.33576   | 0.02138 | 6.35614   | 0.01927 |
| H 44      | 0.22704  | 0.00000   | 0.76971   | 0.00325 | 0.77296   | 0.00015 |
| C 45      | -0.14256 | 1.99878   | 4.12188   | 0.02190 | 6.14256   | 0.07679 |
| C 46      | -0.38720 | 1.99899   | 4.36541   | 0.02280 | 6.38720   | 0.00274 |
| H 47      | 0.22757  | 0.00000   | 0.76909   | 0.00333 | 0.77243   | 0.00009 |
| C 48      | -0.31337 | 1.99898   | 4.29381   | 0.02058 | 6.31337   | 0.06709 |
| H 49      | 0.22685  | 0.00000   | 0.76988   | 0.00327 | 0.77315   | 0.00003 |
| C 50      | -0.17833 | 1.99878   | 4.15725   | 0.02230 | 6.17833   | 0.02495 |
| C 51      | -0.34957 | 1.99900   | 4.32796   | 0.02261 | 6.34957   | 0.12161 |
| H 52      | 0.22999  | 0.00000   | 0.76655   | 0.00345 | 0.77001   | 0.00019 |
| C 53      | -0.35249 | 1.99900   | 4.33061   | 0.02288 | 6.35249   | 0.11686 |
| H 54      | 0.22992  | 0.00000   | 0.76672   | 0.00336 | 0.77008   | 0.00017 |
| C 55      | -0.14720 | 1.99877   | 4.12711   | 0.02132 | 6.14720   | 0.03379 |
| C 56      | -0.37618 | 1.99898   | 4.35410   | 0.02310 | 6.37618   | 0.05238 |
| H 57      | 0.22944  | 0.00000   | 0.76726   | 0.00330 | 0.77056   | 0.00008 |
| C 58      | -0.41729 | 1.99899   | 4.39404   | 0.02425 | 6.41729   | 0.00656 |
| H 59      | 0.22987  | 0.00000   | 0.76673   | 0.00340 | 0.77013   | 0.00004 |
| C 60      | -0.13233 | 1.99877   | 4.11212   | 0.02144 | 6.13233   | 0.06499 |
| C 61      | -0.14335 | 1.99874   | 4.12346   | 0.02116 | 6.14335   | 0.05366 |
| C 62      | -0.17328 | 1.99873   | 4.15203   | 0.02251 | 6.17328   | 0.00214 |
| C 63      | -0.13343 | 1.99874   | 4.11372   | 0.02097 | 6.13343   | 0.05282 |
| C 64      | -0.16033 | 1.99873   | 4.13983   | 0.02177 | 6.16033   | 0.01998 |
| C 65      | -0.15840 | 1.99873   | 4.13828   | 0.02138 | 6.15840   | 0.02723 |
| Cs 66     | 0.92617  | 53.98663  | 0.03179   | 0.05541 | 54.07383  | 0.01402 |
| =====     |          |           |           |         |           |         |
| * Total * | 0.00000  | 403.88436 | 184.87989 | 1.23575 | 590.00000 | 2.00000 |

**Table S14.** NBO charges for  $1^{4-}$ -small model (PBE0/def2-TZVP(Cs)//cc-pvDZ(C,H,O)).

| Atom No | Natural Charge | Natural Population |         |         |          |
|---------|----------------|--------------------|---------|---------|----------|
|         |                | Core               | Valence | Rydberg | Total    |
| Cs 1    | 0.92541        | 53.97776           | 0.02874 | 0.06808 | 54.07459 |
| Cs 2    | 0.92547        | 53.97779           | 0.02870 | 0.06805 | 54.07453 |
| C 3     | -0.17938       | 1.99889            | 4.15166 | 0.02883 | 6.17938  |
| C 4     | -0.17896       | 1.99889            | 4.15126 | 0.02881 | 6.17896  |
| C 5     | -0.17945       | 1.99889            | 4.15171 | 0.02885 | 6.17945  |
| C 6     | -0.17985       | 1.99889            | 4.15208 | 0.02888 | 6.17985  |
| C 7     | -0.17966       | 1.99889            | 4.15190 | 0.02887 | 6.17966  |
| C 8     | -0.18333       | 1.99899            | 4.15528 | 0.02905 | 6.18333  |
| C 9     | -0.38684       | 1.99919            | 4.36100 | 0.02665 | 6.38684  |
| H 10    | 0.19085        | 0.00000            | 0.80644 | 0.00270 | 0.80915  |
| C 11    | -0.38738       | 1.99919            | 4.36153 | 0.02666 | 6.38738  |
| H 12    | 0.19090        | 0.00000            | 0.80640 | 0.00270 | 0.80910  |
| C 13    | -0.18262       | 1.99899            | 4.15459 | 0.02903 | 6.18262  |
| C 14    | -0.38654       | 1.99919            | 4.36074 | 0.02662 | 6.38654  |
| H 15    | 0.19084        | 0.00000            | 0.80646 | 0.00270 | 0.80916  |
| C 16    | -0.38677       | 1.99919            | 4.36096 | 0.02663 | 6.38677  |
| H 17    | 0.19087        | 0.00000            | 0.80643 | 0.00270 | 0.80913  |
| C 18    | -0.18220       | 1.99899            | 4.15421 | 0.02900 | 6.18220  |
| C 19    | -0.38677       | 1.99919            | 4.36097 | 0.02662 | 6.38677  |
| H 20    | 0.19086        | 0.00000            | 0.80644 | 0.00270 | 0.80914  |
| C 21    | -0.38648       | 1.99919            | 4.36068 | 0.02661 | 6.38648  |
| H 22    | 0.19086        | 0.00000            | 0.80644 | 0.00270 | 0.80914  |
| C 23    | -0.18272       | 1.99899            | 4.15469 | 0.02904 | 6.18272  |
| C 24    | -0.38768       | 1.99919            | 4.36182 | 0.02668 | 6.38768  |
| H 25    | 0.19091        | 0.00000            | 0.80639 | 0.00270 | 0.80909  |

|           |          |           |           |         |           |
|-----------|----------|-----------|-----------|---------|-----------|
| C 26      | -0.38712 | 1.99919   | 4.36126   | 0.02667 | 6.38712   |
| H 27      | 0.19088  | 0.00000   | 0.80642   | 0.00270 | 0.80912   |
| C 28      | -0.18339 | 1.99899   | 4.15531   | 0.02908 | 6.18339   |
| C 29      | -0.38739 | 1.99919   | 4.36154   | 0.02666 | 6.38739   |
| H 30      | 0.19091  | 0.00000   | 0.80639   | 0.00270 | 0.80909   |
| C 31      | -0.38708 | 1.99919   | 4.36125   | 0.02665 | 6.38708   |
| H 32      | 0.19090  | 0.00000   | 0.80640   | 0.00270 | 0.80910   |
| Cs 33     | 0.92543  | 53.97776  | 0.02875   | 0.06806 | 54.07457  |
| C 34      | -0.17969 | 1.99889   | 4.15193   | 0.02887 | 6.17969   |
| C 35      | -0.17944 | 1.99889   | 4.15170   | 0.02884 | 6.17944   |
| C 36      | -0.17918 | 1.99889   | 4.15144   | 0.02885 | 6.17918   |
| C 37      | -0.17925 | 1.99889   | 4.15152   | 0.02884 | 6.17925   |
| C 38      | -0.17959 | 1.99889   | 4.15185   | 0.02885 | 6.17959   |
| C 39      | -0.18267 | 1.99899   | 4.15465   | 0.02902 | 6.18267   |
| C 40      | -0.38721 | 1.99919   | 4.36136   | 0.02666 | 6.38721   |
| H 41      | 0.19090  | 0.00000   | 0.80640   | 0.00270 | 0.80910   |
| C 42      | -0.38751 | 1.99919   | 4.36165   | 0.02668 | 6.38751   |
| H 43      | 0.19090  | 0.00000   | 0.80640   | 0.00270 | 0.80910   |
| C 44      | -0.18294 | 1.99899   | 4.15489   | 0.02906 | 6.18294   |
| C 45      | -0.38774 | 1.99919   | 4.36185   | 0.02670 | 6.38774   |
| H 46      | 0.19088  | 0.00000   | 0.80642   | 0.00270 | 0.80912   |
| C 47      | -0.38747 | 1.99919   | 4.36160   | 0.02668 | 6.38747   |
| H 48      | 0.19088  | 0.00000   | 0.80642   | 0.00270 | 0.80912   |
| C 49      | -0.18289 | 1.99899   | 4.15486   | 0.02904 | 6.18289   |
| C 50      | -0.38724 | 1.99919   | 4.36140   | 0.02665 | 6.38724   |
| H 51      | 0.19086  | 0.00000   | 0.80644   | 0.00270 | 0.80914   |
| C 52      | -0.38686 | 1.99919   | 4.36104   | 0.02663 | 6.38686   |
| H 53      | 0.19089  | 0.00000   | 0.80641   | 0.00270 | 0.80911   |
| C 54      | -0.18272 | 1.99899   | 4.15470   | 0.02903 | 6.18272   |
| C 55      | -0.38652 | 1.99919   | 4.36072   | 0.02662 | 6.38652   |
| H 56      | 0.19083  | 0.00000   | 0.80647   | 0.00270 | 0.80917   |
| C 57      | -0.38645 | 1.99919   | 4.36065   | 0.02662 | 6.38645   |
| H 58      | 0.19083  | 0.00000   | 0.80647   | 0.00270 | 0.80917   |
| C 59      | -0.18258 | 1.99899   | 4.15457   | 0.02902 | 6.18258   |
| C 60      | -0.38663 | 1.99919   | 4.36084   | 0.02661 | 6.38663   |
| H 61      | 0.19084  | 0.00000   | 0.80646   | 0.00270 | 0.80916   |
| C 62      | -0.38685 | 1.99919   | 4.36104   | 0.02663 | 6.38685   |
| H 63      | 0.19090  | 0.00000   | 0.80640   | 0.00270 | 0.80910   |
| Cs 64     | 0.95921  | 53.98882  | 0.01395   | 0.03803 | 54.04079  |
| Cs 65     | 0.95919  | 53.98883  | 0.01392   | 0.03806 | 54.04081  |
| Cs 66     | 0.92542  | 53.97770  | 0.02884   | 0.06803 | 54.07458  |
| Cs 67     | 0.92542  | 53.97770  | 0.02886   | 0.06803 | 54.07458  |
| =====     |          |           |           |         |           |
| * Total * | -1.00000 | 457.82893 | 186.58896 | 1.58212 | 646.00000 |

**Table S15.** NBO charges for 1-*full* model (PBE0/def2-TZVP(Cs)//cc-pvDZ(C,H,O)).

| Atom No | Natural Charge | Natural Population |         |         |          | Natural Spin Density |
|---------|----------------|--------------------|---------|---------|----------|----------------------|
|         |                | Core               | Valence | Rydberg | Total    |                      |
| Cs 1    | 0.91631        | 53.98815           | 0.04846 | 0.04708 | 54.08369 | -0.00039             |
| Cs 2    | 0.91631        | 53.98815           | 0.04846 | 0.04708 | 54.08369 | -0.00039             |
| Cs 3    | 0.90420        | 53.98003           | 0.05847 | 0.05729 | 54.09580 | 0.00365              |
| Cs 4    | 0.90420        | 53.98003           | 0.05847 | 0.05729 | 54.09580 | 0.00365              |
| O 5     | -0.61726       | 1.99979            | 6.60658 | 0.01089 | 8.61726  | -0.00004             |
| O 6     | -0.61726       | 1.99979            | 6.60658 | 0.01089 | 8.61726  | -0.00004             |
| O 7     | -0.62234       | 1.99976            | 6.61091 | 0.01167 | 8.62234  | 0.00000              |
| O 8     | -0.62234       | 1.99976            | 6.61091 | 0.01167 | 8.62234  | 0.00000              |
| O 9     | -0.61801       | 1.99979            | 6.60739 | 0.01084 | 8.61801  | -0.00004             |
| O 10    | -0.61801       | 1.99979            | 6.60738 | 0.01084 | 8.61801  | -0.00004             |
| O 11    | -0.60815       | 1.99978            | 6.59735 | 0.01102 | 8.60815  | -0.00002             |
| O 12    | -0.60816       | 1.99978            | 6.59736 | 0.01102 | 8.60816  | -0.00002             |
| O 13    | -0.62064       | 1.99976            | 6.60846 | 0.01242 | 8.62064  | 0.00006              |
| O 14    | -0.62065       | 1.99976            | 6.60847 | 0.01242 | 8.62065  | 0.00006              |
| O 15    | -0.61749       | 1.99979            | 6.60677 | 0.01092 | 8.61749  | 0.00000              |
| O 16    | -0.61751       | 1.99979            | 6.60679 | 0.01092 | 8.61751  | 0.00000              |
| C 17    | -0.37628       | 1.99899            | 4.35522 | 0.02207 | 6.37628  | 0.01695              |
| C 18    | -0.37628       | 1.99899            | 4.35522 | 0.02207 | 6.37628  | 0.01701              |
| H 19    | 0.21410        | 0.00000            | 0.78250 | 0.00340 | 0.78590  | -0.00057             |
| H 20    | 0.21411        | 0.00000            | 0.78249 | 0.00340 | 0.78589  | -0.00057             |
| C 21    | -0.39060       | 1.99899            | 4.36992 | 0.02170 | 6.39060  | -0.00579             |
| C 22    | -0.39062       | 1.99899            | 4.36993 | 0.02170 | 6.39062  | -0.00584             |
| H 23    | 0.21485        | 0.00000            | 0.78188 | 0.00327 | 0.78515  | 0.00010              |

|      |          |         |         |         |         |          |
|------|----------|---------|---------|---------|---------|----------|
| H 24 | 0.21487  | 0.00000 | 0.78187 | 0.00327 | 0.78513 | 0.00011  |
| C 25 | -0.12660 | 1.99876 | 4.10733 | 0.02051 | 6.12660 | 0.06960  |
| C 26 | -0.12658 | 1.99876 | 4.10732 | 0.02051 | 6.12658 | 0.06962  |
| C 27 | -0.34275 | 1.99900 | 4.32379 | 0.01997 | 6.34275 | 0.03626  |
| C 28 | -0.34276 | 1.99900 | 4.32379 | 0.01997 | 6.34276 | 0.03626  |
| H 29 | 0.21516  | 0.00000 | 0.78141 | 0.00343 | 0.78484 | -0.00099 |
| H 30 | 0.21516  | 0.00000 | 0.78141 | 0.00343 | 0.78484 | -0.00099 |
| C 31 | -0.26960 | 1.99898 | 4.25102 | 0.01959 | 6.26960 | 0.15336  |
| C 32 | -0.26956 | 1.99898 | 4.25099 | 0.01959 | 6.26956 | 0.15330  |
| H 33 | 0.21890  | 0.00000 | 0.77767 | 0.00343 | 0.78110 | -0.00473 |
| H 34 | 0.21889  | 0.00000 | 0.77768 | 0.00343 | 0.78111 | -0.00473 |
| C 35 | -0.16667 | 1.99876 | 4.14654 | 0.02137 | 6.16667 | -0.03045 |
| C 36 | -0.16669 | 1.99876 | 4.14657 | 0.02137 | 6.16669 | -0.03043 |
| C 37 | -0.32665 | 1.99898 | 4.30651 | 0.02115 | 6.32665 | 0.13169  |
| C 38 | -0.32662 | 1.99898 | 4.30649 | 0.02115 | 6.32662 | 0.13169  |
| H 39 | 0.21986  | 0.00000 | 0.77691 | 0.00324 | 0.78014 | -0.00413 |
| H 40 | 0.21985  | 0.00000 | 0.77691 | 0.00324 | 0.78015 | -0.00413 |
| C 41 | -0.41904 | 1.99901 | 4.39743 | 0.02260 | 6.41904 | -0.02881 |
| C 42 | -0.41903 | 1.99901 | 4.39742 | 0.02260 | 6.41903 | -0.02881 |
| H 43 | 0.21369  | 0.00000 | 0.78314 | 0.00317 | 0.78631 | 0.00095  |
| H 44 | 0.21369  | 0.00000 | 0.78314 | 0.00317 | 0.78631 | 0.00095  |
| C 45 | -0.10875 | 1.99877 | 4.08979 | 0.02019 | 6.10875 | 0.10544  |
| C 46 | -0.10876 | 1.99877 | 4.08981 | 0.02019 | 6.10876 | 0.10546  |
| C 47 | -0.43002 | 1.99900 | 4.40814 | 0.02288 | 6.43002 | -0.03079 |
| C 48 | -0.43004 | 1.99900 | 4.40817 | 0.02288 | 6.43004 | -0.03076 |
| H 49 | 0.21972  | 0.00000 | 0.77708 | 0.00320 | 0.78028 | 0.00081  |
| H 50 | 0.21972  | 0.00000 | 0.77708 | 0.00320 | 0.78028 | 0.00081  |
| C 51 | -0.34138 | 1.99898 | 4.32080 | 0.02160 | 6.34138 | 0.15222  |
| C 52 | -0.34135 | 1.99898 | 4.32077 | 0.02160 | 6.34135 | 0.15221  |
| H 53 | 0.22318  | 0.00000 | 0.77356 | 0.00326 | 0.77682 | -0.00472 |
| H 54 | 0.22318  | 0.00000 | 0.77356 | 0.00326 | 0.77682 | -0.00472 |
| C 55 | -0.16665 | 1.99876 | 4.14613 | 0.02177 | 6.16665 | -0.04190 |
| C 56 | -0.16667 | 1.99876 | 4.14614 | 0.02177 | 6.16667 | -0.04189 |
| C 57 | -0.30809 | 1.99898 | 4.28792 | 0.02119 | 6.30809 | 0.19275  |
| C 58 | -0.30807 | 1.99898 | 4.28790 | 0.02119 | 6.30807 | 0.19271  |
| H 59 | 0.21461  | 0.00000 | 0.78166 | 0.00373 | 0.78539 | -0.00586 |
| H 60 | 0.21461  | 0.00000 | 0.78165 | 0.00373 | 0.78539 | -0.00586 |
| C 61 | -0.38801 | 1.99900 | 4.36644 | 0.02257 | 6.38801 | 0.07694  |
| C 62 | -0.38799 | 1.99900 | 4.36643 | 0.02257 | 6.38799 | 0.07686  |
| H 63 | 0.21316  | 0.00000 | 0.78338 | 0.00346 | 0.78684 | -0.00229 |
| H 64 | 0.21316  | 0.00000 | 0.78338 | 0.00346 | 0.78684 | -0.00229 |
| C 65 | -0.13203 | 1.99876 | 4.11245 | 0.02082 | 6.13203 | 0.04827  |
| C 66 | -0.13203 | 1.99876 | 4.11246 | 0.02082 | 6.13203 | 0.04820  |
| C 67 | -0.13333 | 1.99873 | 4.11422 | 0.02037 | 6.13333 | 0.04634  |
| C 68 | -0.13333 | 1.99873 | 4.11423 | 0.02037 | 6.13333 | 0.04633  |
| C 69 | -0.12867 | 1.99874 | 4.10997 | 0.01996 | 6.12867 | 0.03399  |
| C 70 | -0.12867 | 1.99874 | 4.10997 | 0.01996 | 6.12867 | 0.03400  |
| C 71 | -0.15321 | 1.99873 | 4.13415 | 0.02033 | 6.15321 | -0.00367 |
| C 72 | -0.15320 | 1.99873 | 4.13414 | 0.02033 | 6.15320 | -0.00368 |
| C 73 | -0.12566 | 1.99874 | 4.10699 | 0.01993 | 6.12566 | 0.08056  |
| C 74 | -0.12567 | 1.99874 | 4.10700 | 0.01993 | 6.12567 | 0.08055  |
| C 75 | -0.14529 | 1.99871 | 4.12485 | 0.02173 | 6.14529 | 0.00099  |
| C 76 | -0.14530 | 1.99871 | 4.12486 | 0.02173 | 6.14530 | 0.00098  |
| C 77 | -0.27482 | 1.99935 | 4.25999 | 0.01547 | 6.27482 | 0.00033  |
| C 78 | -0.27482 | 1.99935 | 4.25999 | 0.01547 | 6.27482 | 0.00033  |
| H 79 | 0.20751  | 0.00000 | 0.78824 | 0.00425 | 0.79249 | 0.00007  |
| H 80 | 0.20751  | 0.00000 | 0.78824 | 0.00425 | 0.79249 | 0.00006  |
| H 81 | 0.20704  | 0.00000 | 0.79057 | 0.00239 | 0.79296 | 0.00001  |
| H 82 | 0.20704  | 0.00000 | 0.79057 | 0.00239 | 0.79296 | 0.00001  |
| H 83 | 0.17660  | 0.00000 | 0.81941 | 0.00399 | 0.82340 | -0.00003 |
| H 84 | 0.17660  | 0.00000 | 0.81941 | 0.00399 | 0.82340 | -0.00003 |
| C 85 | -0.09655 | 1.99916 | 4.07768 | 0.01971 | 6.09655 | 0.00017  |
| C 86 | -0.09655 | 1.99916 | 4.07768 | 0.01970 | 6.09655 | 0.00017  |
| H 87 | 0.22044  | 0.00000 | 0.77352 | 0.00604 | 0.77956 | 0.00033  |
| H 88 | 0.22044  | 0.00000 | 0.77352 | 0.00604 | 0.77956 | 0.00033  |
| H 89 | 0.19524  | 0.00000 | 0.80015 | 0.00461 | 0.80476 | -0.00002 |
| H 90 | 0.19524  | 0.00000 | 0.80015 | 0.00461 | 0.80476 | -0.00002 |
| C 91 | -0.08482 | 1.99917 | 4.06609 | 0.01956 | 6.08482 | 0.00000  |
| C 92 | -0.08482 | 1.99917 | 4.06610 | 0.01956 | 6.08482 | 0.00000  |
| H 93 | 0.19483  | 0.00000 | 0.79873 | 0.00644 | 0.80517 | 0.00000  |
| H 94 | 0.19484  | 0.00000 | 0.79872 | 0.00644 | 0.80516 | 0.00000  |
| H 95 | 0.19900  | 0.00000 | 0.79624 | 0.00476 | 0.80100 | -0.00002 |
| H 96 | 0.19901  | 0.00000 | 0.79623 | 0.00476 | 0.80099 | -0.00002 |
| C 97 | -0.08488 | 1.99917 | 4.06617 | 0.01954 | 6.08488 | 0.00001  |
| C 98 | -0.08488 | 1.99917 | 4.06617 | 0.01954 | 6.08488 | 0.00001  |
| H 99 | 0.19828  | 0.00000 | 0.79698 | 0.00474 | 0.80172 | 0.00001  |
| H100 | 0.19828  | 0.00000 | 0.79698 | 0.00474 | 0.80172 | 0.00001  |

|       |          |          |         |         |          |          |
|-------|----------|----------|---------|---------|----------|----------|
| H101  | 0.19509  | 0.00000  | 0.79856 | 0.00636 | 0.80491  | 0.00005  |
| H102  | 0.19509  | 0.00000  | 0.79856 | 0.00636 | 0.80491  | 0.00005  |
| C103  | -0.09670 | 1.99916  | 4.07797 | 0.01957 | 6.09670  | 0.00026  |
| C104  | -0.09670 | 1.99916  | 4.07797 | 0.01957 | 6.09670  | 0.00026  |
| H105  | 0.19461  | 0.00000  | 0.80073 | 0.00466 | 0.80539  | -0.00002 |
| H106  | 0.19461  | 0.00000  | 0.80073 | 0.00466 | 0.80539  | -0.00002 |
| H107  | 0.22163  | 0.00000  | 0.77224 | 0.00613 | 0.77837  | 0.00005  |
| H108  | 0.22163  | 0.00000  | 0.77224 | 0.00613 | 0.77837  | 0.00005  |
| C109  | -0.27407 | 1.99935  | 4.25924 | 0.01548 | 6.27407  | 0.00022  |
| C110  | -0.27407 | 1.99935  | 4.25924 | 0.01548 | 6.27407  | 0.00022  |
| H111  | 0.17663  | 0.00000  | 0.81939 | 0.00398 | 0.82337  | 0.00000  |
| H112  | 0.17663  | 0.00000  | 0.81939 | 0.00398 | 0.82337  | 0.00000  |
| H113  | 0.20935  | 0.00000  | 0.78821 | 0.00244 | 0.79065  | -0.00004 |
| H114  | 0.20935  | 0.00000  | 0.78821 | 0.00244 | 0.79065  | -0.00004 |
| H115  | 0.20525  | 0.00000  | 0.79028 | 0.00447 | 0.79475  | 0.00031  |
| H116  | 0.20525  | 0.00000  | 0.79028 | 0.00447 | 0.79475  | 0.00031  |
| C117  | -0.27134 | 1.99935  | 4.25584 | 0.01616 | 6.27134  | 0.00090  |
| C118  | -0.27134 | 1.99935  | 4.25583 | 0.01616 | 6.27134  | 0.00090  |
| H119  | 0.17833  | 0.00000  | 0.81774 | 0.00393 | 0.82167  | 0.00017  |
| H120  | 0.17833  | 0.00000  | 0.81774 | 0.00393 | 0.82167  | 0.00017  |
| H121  | 0.20514  | 0.00000  | 0.79210 | 0.00276 | 0.79486  | 0.00000  |
| H122  | 0.20514  | 0.00000  | 0.79211 | 0.00276 | 0.79486  | 0.00000  |
| H123  | 0.20168  | 0.00000  | 0.79335 | 0.00497 | 0.79832  | 0.00115  |
| H124  | 0.20168  | 0.00000  | 0.79335 | 0.00497 | 0.79832  | 0.00115  |
| C125  | -0.09277 | 1.99916  | 4.07368 | 0.01992 | 6.09277  | 0.00005  |
| C126  | -0.09277 | 1.99916  | 4.07368 | 0.01992 | 6.09277  | 0.00005  |
| H127  | 0.19437  | 0.00000  | 0.80099 | 0.00464 | 0.80563  | -0.00001 |
| H128  | 0.19437  | 0.00000  | 0.80099 | 0.00464 | 0.80563  | -0.00001 |
| H129  | 0.20932  | 0.00000  | 0.78356 | 0.00711 | 0.79068  | 0.00008  |
| H130  | 0.20932  | 0.00000  | 0.78356 | 0.00711 | 0.79068  | 0.00008  |
| C131  | -0.08469 | 1.99917  | 4.06579 | 0.01973 | 6.08469  | 0.00007  |
| C132  | -0.08469 | 1.99917  | 4.06579 | 0.01973 | 6.08469  | 0.00007  |
| H133  | 0.19583  | 0.00000  | 0.79964 | 0.00453 | 0.80417  | 0.00001  |
| H134  | 0.19582  | 0.00000  | 0.79964 | 0.00453 | 0.80418  | 0.00001  |
| H135  | 0.19940  | 0.00000  | 0.79441 | 0.00619 | 0.80060  | 0.00000  |
| H136  | 0.19940  | 0.00000  | 0.79441 | 0.00619 | 0.80060  | 0.00000  |
| C137  | -0.10104 | 1.99919  | 4.08419 | 0.01766 | 6.10104  | 0.00004  |
| C138  | -0.10104 | 1.99919  | 4.08419 | 0.01766 | 6.10104  | 0.00004  |
| H139  | 0.20463  | 0.00000  | 0.79056 | 0.00481 | 0.79537  | 0.00007  |
| H140  | 0.20463  | 0.00000  | 0.79056 | 0.00481 | 0.79537  | 0.00007  |
| H141  | 0.18544  | 0.00000  | 0.80953 | 0.00502 | 0.81456  | 0.00015  |
| H142  | 0.18545  | 0.00000  | 0.80953 | 0.00502 | 0.81455  | 0.00015  |
| C143  | -0.09313 | 1.99913  | 4.06955 | 0.02444 | 6.09313  | 0.00172  |
| C144  | -0.09313 | 1.99913  | 4.06955 | 0.02444 | 6.09313  | 0.00172  |
| H145  | 0.19385  | 0.00000  | 0.80142 | 0.00473 | 0.80615  | -0.00002 |
| H146  | 0.19384  | 0.00000  | 0.80143 | 0.00473 | 0.80616  | -0.00002 |
| H147  | 0.23877  | 0.00000  | 0.75420 | 0.00704 | 0.76123  | 0.00127  |
| H148  | 0.23877  | 0.00000  | 0.75419 | 0.00704 | 0.76123  | 0.00127  |
| C149  | -0.27174 | 1.99935  | 4.25452 | 0.01788 | 6.27174  | 0.00034  |
| C150  | -0.27176 | 1.99935  | 4.25453 | 0.01788 | 6.27176  | 0.00034  |
| H151  | 0.18682  | 0.00000  | 0.80833 | 0.00485 | 0.81318  | 0.00006  |
| H152  | 0.18682  | 0.00000  | 0.80834 | 0.00485 | 0.81318  | 0.00006  |
| H153  | 0.21517  | 0.00000  | 0.78089 | 0.00394 | 0.78483  | 0.00107  |
| H154  | 0.21518  | 0.00000  | 0.78089 | 0.00394 | 0.78482  | 0.00107  |
| H155  | 0.17929  | 0.00000  | 0.81575 | 0.00496 | 0.82071  | -0.00002 |
| H156  | 0.17929  | 0.00000  | 0.81575 | 0.00496 | 0.82071  | -0.00002 |
| Cs157 | 0.89709  | 53.97911 | 0.06376 | 0.06003 | 54.10291 | 0.00393  |
| Cs158 | 0.89709  | 53.97911 | 0.06376 | 0.06003 | 54.10291 | 0.00393  |
| O159  | -0.61448 | 1.99978  | 6.60349 | 0.01121 | 8.61448  | 0.00002  |
| O160  | -0.61447 | 1.99978  | 6.60348 | 0.01121 | 8.61447  | 0.00002  |
| O161  | -0.61034 | 1.99976  | 6.59823 | 0.01235 | 8.61034  | 0.00000  |
| O162  | -0.61034 | 1.99976  | 6.59823 | 0.01235 | 8.61034  | 0.00000  |
| O163  | -0.61479 | 1.99978  | 6.60385 | 0.01116 | 8.61479  | 0.00032  |
| O164  | -0.61479 | 1.99978  | 6.60385 | 0.01116 | 8.61479  | 0.00032  |
| C165  | -0.27018 | 1.99936  | 4.25498 | 0.01585 | 6.27018  | 0.00005  |
| C166  | -0.27019 | 1.99936  | 4.25498 | 0.01585 | 6.27019  | 0.00005  |
| H167  | 0.18814  | 0.00000  | 0.80803 | 0.00383 | 0.81186  | 0.00003  |
| H168  | 0.18814  | 0.00000  | 0.80803 | 0.00383 | 0.81186  | 0.00003  |
| H169  | 0.22297  | 0.00000  | 0.77219 | 0.00484 | 0.77703  | 0.00007  |
| H170  | 0.22297  | 0.00000  | 0.77218 | 0.00484 | 0.77703  | 0.00007  |
| H171  | 0.17588  | 0.00000  | 0.82013 | 0.00399 | 0.82412  | 0.00005  |
| H172  | 0.17588  | 0.00000  | 0.82013 | 0.00399 | 0.82412  | 0.00005  |
| C173  | -0.08541 | 1.99918  | 4.06702 | 0.01921 | 6.08541  | 0.00002  |
| C174  | -0.08542 | 1.99918  | 4.06702 | 0.01921 | 6.08542  | 0.00002  |
| H175  | 0.20061  | 0.00000  | 0.79328 | 0.00611 | 0.79939  | 0.00001  |
| H176  | 0.20061  | 0.00000  | 0.79328 | 0.00611 | 0.79939  | 0.00001  |
| H177  | 0.19461  | 0.00000  | 0.80072 | 0.00466 | 0.80539  | 0.00000  |

|           |          |           |           |         |         |          |
|-----------|----------|-----------|-----------|---------|---------|----------|
| H178      | 0.19461  | 0.00000   | 0.80073   | 0.00466 | 0.80539 | 0.00000  |
| C179      | -0.08684 | 1.99918   | 4.06773   | 0.01993 | 6.08684 | 0.00016  |
| C180      | -0.08684 | 1.99918   | 4.06773   | 0.01993 | 6.08684 | 0.00016  |
| H181      | 0.19608  | 0.00000   | 0.79784   | 0.00608 | 0.80392 | 0.00040  |
| H182      | 0.19608  | 0.00000   | 0.79784   | 0.00608 | 0.80392 | 0.00040  |
| H183      | 0.19729  | 0.00000   | 0.79808   | 0.00462 | 0.80271 | 0.00001  |
| H184      | 0.19729  | 0.00000   | 0.79808   | 0.00462 | 0.80271 | 0.00001  |
| C185      | -0.08967 | 1.99916   | 4.07050   | 0.02001 | 6.08967 | -0.00007 |
| C186      | -0.08966 | 1.99916   | 4.07050   | 0.02001 | 6.08966 | -0.00007 |
| H187      | 0.19633  | 0.00000   | 0.79920   | 0.00448 | 0.80367 | -0.00001 |
| H188      | 0.19633  | 0.00000   | 0.79920   | 0.00448 | 0.80367 | -0.00001 |
| H189      | 0.20389  | 0.00000   | 0.78968   | 0.00643 | 0.79611 | -0.00007 |
| H190      | 0.20389  | 0.00000   | 0.78968   | 0.00643 | 0.79611 | -0.00007 |
| C191      | -0.08334 | 1.99918   | 4.06482   | 0.01934 | 6.08334 | 0.00020  |
| C192      | -0.08333 | 1.99918   | 4.06481   | 0.01934 | 6.08333 | 0.00020  |
| H193      | 0.20050  | 0.00000   | 0.79487   | 0.00463 | 0.79950 | 0.00004  |
| H194      | 0.20050  | 0.00000   | 0.79487   | 0.00463 | 0.79950 | 0.00004  |
| H195      | 0.19512  | 0.00000   | 0.79892   | 0.00597 | 0.80488 | -0.00001 |
| H196      | 0.19512  | 0.00000   | 0.79892   | 0.00597 | 0.80488 | -0.00001 |
| C197      | -0.27425 | 1.99936   | 4.25847   | 0.01642 | 6.27425 | 0.00038  |
| C198      | -0.27426 | 1.99936   | 4.25847   | 0.01642 | 6.27426 | 0.00038  |
| H199      | 0.17878  | 0.00000   | 0.81709   | 0.00414 | 0.82122 | 0.00005  |
| H200      | 0.17878  | 0.00000   | 0.81709   | 0.00414 | 0.82122 | 0.00005  |
| H201      | 0.23165  | 0.00000   | 0.76439   | 0.00397 | 0.76835 | -0.00006 |
| H202      | 0.23165  | 0.00000   | 0.76439   | 0.00397 | 0.76835 | -0.00006 |
| H203      | 0.18279  | 0.00000   | 0.81323   | 0.00398 | 0.81721 | 0.00001  |
| H204      | 0.18280  | 0.00000   | 0.81322   | 0.00398 | 0.81720 | 0.00001  |
| =====     |          |           |           |         |         |          |
| * Total * | 0.00000  | 511.81754 | 519.66021 | 2.52224 | *****   | 2.00000  |

**Table S16.** NBO charges for **1H-full** model (PBE0/def2-TZVP(Cs)//cc-pvDZ(C,H,O)).

| Atom No | Natural Charge | Natural Population |         |         |          | Natural Spin Density |
|---------|----------------|--------------------|---------|---------|----------|----------------------|
|         |                | Core               | Valence | Rydberg | Total    |                      |
| Cs 1    | 0.91673        | 53.98673           | 0.05097 | 0.04557 | 54.08327 | -0.00057             |
| Cs 2    | 0.89976        | 53.97487           | 0.06803 | 0.05733 | 54.10024 | 0.00380              |
| O 3     | -0.61493       | 1.99980            | 6.60454 | 0.01059 | 8.61493  | 0.00003              |
| O 4     | -0.62049       | 1.99977            | 6.60918 | 0.01154 | 8.62049  | -0.00002             |
| O 5     | -0.61135       | 1.99979            | 6.60085 | 0.01071 | 8.61135  | -0.00002             |
| O 6     | -0.61285       | 1.99980            | 6.60263 | 0.01042 | 8.61285  | 0.00004              |
| O 7     | -0.62875       | 1.99977            | 6.61679 | 0.01220 | 8.62875  | 0.00005              |
| O 8     | -0.61955       | 1.99981            | 6.60936 | 0.01039 | 8.61955  | 0.00005              |
| C 9     | -0.39737       | 1.99898            | 4.37463 | 0.02376 | 6.39737  | -0.02454             |
| H 10    | 0.21901        | 0.00000            | 0.77775 | 0.00324 | 0.78099  | 0.00101              |
| C 11    | -0.32532       | 1.99897            | 4.30564 | 0.02071 | 6.32532  | 0.14582              |
| H 12    | 0.21693        | 0.00000            | 0.77978 | 0.00328 | 0.78307  | -0.00458             |
| C 13    | -0.17561       | 1.99878            | 4.15591 | 0.02091 | 6.17561  | -0.03641             |
| C 14    | -0.29052       | 1.99898            | 4.27230 | 0.01924 | 6.29052  | 0.14547              |
| H 15    | 0.21316        | 0.00000            | 0.78329 | 0.00354 | 0.78684  | -0.00460             |
| C 16    | -0.31855       | 1.99897            | 4.29859 | 0.02099 | 6.31855  | 0.02273              |
| H 17    | 0.22053        | 0.00000            | 0.77616 | 0.00330 | 0.77947  | -0.00066             |
| C 18    | -0.10543       | 1.99875            | 4.08639 | 0.02030 | 6.10543  | 0.08583              |
| C 19    | -0.38741       | 1.99899            | 4.36608 | 0.02235 | 6.38741  | -0.02357             |
| H 20    | 0.22106        | 0.00000            | 0.77581 | 0.00312 | 0.77894  | 0.00065              |
| C 21    | -0.37375       | 1.99897            | 4.35396 | 0.02082 | 6.37375  | 0.03837              |
| H 22    | 0.21326        | 0.00000            | 0.78344 | 0.00331 | 0.78674  | -0.00139             |
| C 23    | -0.15205       | 1.99876            | 4.13212 | 0.02117 | 6.15205  | 0.02855              |
| C 24    | -0.38809       | 1.99898            | 4.36654 | 0.02258 | 6.38809  | 0.10162              |
| H 25    | 0.22130        | 0.00000            | 0.77537 | 0.00332 | 0.77870  | -0.00310             |
| C 26    | -0.33206       | 1.99897            | 4.31063 | 0.02246 | 6.33206  | 0.18704              |
| H 27    | 0.22519        | 0.00000            | 0.77163 | 0.00318 | 0.77481  | -0.00558             |
| C 28    | -0.16340       | 1.99872            | 4.14226 | 0.02242 | 6.16340  | -0.03396             |
| C 29    | -0.34350       | 1.99897            | 4.32250 | 0.02203 | 6.34350  | 0.13369              |
| H 30    | 0.21537        | 0.00000            | 0.78120 | 0.00343 | 0.78463  | -0.00420             |
| C 31    | -0.42904       | 1.99897            | 4.40665 | 0.02342 | 6.42904  | -0.03514             |
| H 32    | 0.21990        | 0.00000            | 0.77666 | 0.00344 | 0.78010  | 0.00093              |
| C 33    | -0.10848       | 1.99876            | 4.08894 | 0.02079 | 6.10848  | 0.11325              |
| C 34    | -0.12623       | 1.99871            | 4.10757 | 0.01995 | 6.12623  | 0.07066              |
| C 35    | -0.15098       | 1.99873            | 4.13130 | 0.02094 | 6.15098  | -0.00377             |
| C 36    | -0.12712       | 1.99870            | 4.10893 | 0.01949 | 6.12712  | 0.03113              |
| C 37    | -0.14669       | 1.99875            | 4.12677 | 0.02117 | 6.14669  | 0.04804              |
| C 38    | -0.14353       | 1.99872            | 4.12317 | 0.02164 | 6.14353  | 0.00931              |

|       |          |          |         |         |          |          |
|-------|----------|----------|---------|---------|----------|----------|
| C 39  | -0.28431 | 1.99935  | 4.26988 | 0.01508 | 6.28431  | -0.00010 |
| H 40  | 0.20694  | 0.00000  | 0.78896 | 0.00410 | 0.79306  | 0.00019  |
| H 41  | 0.20657  | 0.00000  | 0.79109 | 0.00234 | 0.79343  | -0.00001 |
| H 42  | 0.18212  | 0.00000  | 0.81390 | 0.00398 | 0.81788  | 0.00001  |
| C 43  | -0.10017 | 1.99911  | 4.08097 | 0.02009 | 6.10017  | 0.00000  |
| H 44  | 0.22275  | 0.00000  | 0.77046 | 0.00679 | 0.77725  | 0.00007  |
| H 45  | 0.19501  | 0.00000  | 0.80046 | 0.00453 | 0.80499  | 0.00000  |
| C 46  | -0.08830 | 1.99915  | 4.06979 | 0.01936 | 6.08830  | -0.00001 |
| H 47  | 0.19371  | 0.00000  | 0.80003 | 0.00626 | 0.80629  | 0.00014  |
| H 48  | 0.20451  | 0.00000  | 0.79073 | 0.00477 | 0.79549  | -0.00004 |
| C 49  | -0.08857 | 1.99917  | 4.07048 | 0.01892 | 6.08857  | 0.00005  |
| H 50  | 0.20579  | 0.00000  | 0.78942 | 0.00479 | 0.79421  | 0.00005  |
| H 51  | 0.19394  | 0.00000  | 0.79999 | 0.00607 | 0.80606  | 0.00007  |
| C 52  | -0.10282 | 1.99913  | 4.08429 | 0.01939 | 6.10282  | -0.00015 |
| H 53  | 0.19594  | 0.00000  | 0.79958 | 0.00448 | 0.80406  | 0.00000  |
| H 54  | 0.22293  | 0.00000  | 0.77091 | 0.00616 | 0.77707  | 0.00005  |
| C 55  | -0.28099 | 1.99938  | 4.26648 | 0.01513 | 6.28099  | -0.00004 |
| H 56  | 0.18306  | 0.00000  | 0.81290 | 0.00404 | 0.81694  | 0.00001  |
| H 57  | 0.20900  | 0.00000  | 0.78868 | 0.00231 | 0.79100  | 0.00000  |
| H 58  | 0.19535  | 0.00000  | 0.80004 | 0.00461 | 0.80465  | -0.00003 |
| C 59  | -0.27126 | 1.99933  | 4.25581 | 0.01613 | 6.27126  | 0.00020  |
| H 60  | 0.17947  | 0.00000  | 0.81661 | 0.00392 | 0.82053  | 0.00009  |
| H 61  | 0.20969  | 0.00000  | 0.78732 | 0.00299 | 0.79031  | 0.00004  |
| H 62  | 0.20081  | 0.00000  | 0.79401 | 0.00518 | 0.79919  | 0.00002  |
| C 63  | -0.10115 | 1.99913  | 4.08233 | 0.01970 | 6.10115  | 0.00042  |
| H 64  | 0.20115  | 0.00000  | 0.79424 | 0.00462 | 0.79885  | 0.00002  |
| H 65  | 0.21310  | 0.00000  | 0.78045 | 0.00646 | 0.78690  | 0.00048  |
| C 66  | -0.09191 | 1.99912  | 4.07315 | 0.01964 | 6.09191  | -0.00001 |
| H 67  | 0.20280  | 0.00000  | 0.79283 | 0.00437 | 0.79720  | 0.00002  |
| H 68  | 0.20675  | 0.00000  | 0.78735 | 0.00590 | 0.79325  | 0.00006  |
| C 69  | -0.10448 | 1.99918  | 4.08802 | 0.01728 | 6.10448  | 0.00001  |
| H 70  | 0.20683  | 0.00000  | 0.78854 | 0.00463 | 0.79317  | 0.00009  |
| H 71  | 0.19032  | 0.00000  | 0.80479 | 0.00489 | 0.80968  | -0.00001 |
| C 72  | -0.09576 | 1.99913  | 4.07284 | 0.02379 | 6.09576  | 0.00099  |
| H 73  | 0.19838  | 0.00000  | 0.79683 | 0.00479 | 0.80162  | 0.00007  |
| H 74  | 0.23579  | 0.00000  | 0.75715 | 0.00706 | 0.76421  | 0.00129  |
| C 75  | -0.27965 | 1.99934  | 4.26263 | 0.01768 | 6.27965  | 0.00101  |
| H 76  | 0.19136  | 0.00000  | 0.80374 | 0.00490 | 0.80864  | -0.00004 |
| H 77  | 0.22296  | 0.00000  | 0.77218 | 0.00486 | 0.77704  | 0.00106  |
| H 78  | 0.17937  | 0.00000  | 0.81649 | 0.00414 | 0.82063  | 0.00006  |
| Cs 79 | 0.89300  | 53.97416 | 0.07509 | 0.05774 | 54.10700 | 0.00342  |
| Cs 80 | 0.89300  | 53.97416 | 0.07509 | 0.05774 | 54.10700 | 0.00342  |
| Cs 81 | 0.89977  | 53.97487 | 0.06803 | 0.05733 | 54.10023 | 0.00380  |
| C 82  | -0.39730 | 1.99898  | 4.37456 | 0.02376 | 6.39730  | -0.02459 |
| C 83  | -0.32532 | 1.99897  | 4.30564 | 0.02072 | 6.32532  | 0.14582  |
| C 84  | -0.17551 | 1.99878  | 4.15581 | 0.02092 | 6.17551  | -0.03642 |
| C 85  | -0.12624 | 1.99871  | 4.10757 | 0.01995 | 6.12624  | 0.07064  |
| C 86  | -0.15095 | 1.99873  | 4.13127 | 0.02094 | 6.15095  | -0.00376 |
| O 87  | -0.61285 | 1.99979  | 6.60234 | 0.01073 | 8.61285  | 0.00001  |
| O 88  | -0.60775 | 1.99977  | 6.59599 | 0.01199 | 8.60775  | 0.00000  |
| O 89  | -0.60891 | 1.99979  | 6.59829 | 0.01083 | 8.60891  | 0.00028  |
| C 90  | -0.27457 | 1.99934  | 4.25953 | 0.01570 | 6.27457  | 0.00063  |
| H 91  | 0.18906  | 0.00000  | 0.80717 | 0.00376 | 0.81094  | -0.00003 |
| H 92  | 0.22858  | 0.00000  | 0.76683 | 0.00459 | 0.77142  | 0.00047  |
| H 93  | 0.17263  | 0.00000  | 0.82334 | 0.00404 | 0.82737  | 0.00000  |
| C 94  | -0.09034 | 1.99915  | 4.07218 | 0.01901 | 6.09034  | 0.00001  |
| H 95  | 0.20012  | 0.00000  | 0.79381 | 0.00608 | 0.79988  | 0.00001  |
| H 96  | 0.19635  | 0.00000  | 0.79914 | 0.00451 | 0.80365  | 0.00001  |
| C 97  | -0.09488 | 1.99915  | 4.07575 | 0.01999 | 6.09488  | 0.00013  |
| H 98  | 0.19960  | 0.00000  | 0.79308 | 0.00732 | 0.80040  | 0.00019  |
| H 99  | 0.19929  | 0.00000  | 0.79614 | 0.00457 | 0.80071  | 0.00001  |
| C100  | -0.09479 | 1.99914  | 4.07626 | 0.01939 | 6.09479  | 0.00064  |
| H101  | 0.19628  | 0.00000  | 0.79929 | 0.00442 | 0.80372  | 0.00005  |
| H102  | 0.21192  | 0.00000  | 0.78210 | 0.00598 | 0.78808  | 0.00021  |
| C103  | -0.08890 | 1.99917  | 4.07078 | 0.01895 | 6.08890  | 0.00020  |
| H104  | 0.20198  | 0.00000  | 0.79344 | 0.00458 | 0.79802  | 0.00000  |
| H105  | 0.19584  | 0.00000  | 0.79837 | 0.00579 | 0.80416  | 0.00004  |
| C106  | -0.28576 | 1.99935  | 4.26977 | 0.01664 | 6.28576  | 0.00096  |
| H107  | 0.17885  | 0.00000  | 0.81687 | 0.00428 | 0.82115  | 0.00032  |
| H108  | 0.23460  | 0.00000  | 0.76104 | 0.00436 | 0.76540  | 0.00024  |
| H109  | 0.18455  | 0.00000  | 0.81169 | 0.00376 | 0.81545  | 0.00011  |
| C110  | -0.16343 | 1.99872  | 4.14229 | 0.02242 | 6.16343  | -0.03398 |
| C111  | -0.34344 | 1.99897  | 4.32244 | 0.02203 | 6.34344  | 0.13372  |
| C112  | -0.42915 | 1.99897  | 4.40676 | 0.02342 | 6.42915  | -0.03513 |
| C113  | -0.10848 | 1.99876  | 4.08893 | 0.02079 | 6.10848  | 0.11324  |
| C114  | -0.14356 | 1.99872  | 4.12320 | 0.02164 | 6.14356  | 0.00931  |
| Cs115 | 0.91674  | 53.98672 | 0.05098 | 0.04555 | 54.08326 | -0.00058 |

|      |          |         |         |         |         |          |
|------|----------|---------|---------|---------|---------|----------|
| O116 | -0.61493 | 1.99980 | 6.60455 | 0.01059 | 8.61493 | 0.00003  |
| O117 | -0.62048 | 1.99977 | 6.60916 | 0.01154 | 8.62048 | -0.00002 |
| O118 | -0.61133 | 1.99979 | 6.60083 | 0.01070 | 8.61133 | -0.00002 |
| O119 | -0.61287 | 1.99980 | 6.60265 | 0.01042 | 8.61287 | 0.00004  |
| O120 | -0.62876 | 1.99977 | 6.61680 | 0.01220 | 8.62876 | 0.00005  |
| O121 | -0.61954 | 1.99981 | 6.60935 | 0.01039 | 8.61954 | 0.00005  |
| H122 | 0.21900  | 0.00000 | 0.77777 | 0.00324 | 0.78100 | 0.00101  |
| H123 | 0.21689  | 0.00000 | 0.77982 | 0.00328 | 0.78311 | -0.00458 |
| C124 | -0.29053 | 1.99898 | 4.27230 | 0.01925 | 6.29053 | 0.14553  |
| H125 | 0.21317  | 0.00000 | 0.78328 | 0.00354 | 0.78683 | -0.00460 |
| C126 | -0.31863 | 1.99897 | 4.29867 | 0.02098 | 6.31863 | 0.02280  |
| H127 | 0.22054  | 0.00000 | 0.77616 | 0.00330 | 0.77946 | -0.00067 |
| C128 | -0.10543 | 1.99875 | 4.08638 | 0.02029 | 6.10543 | 0.08578  |
| C129 | -0.38743 | 1.99899 | 4.36609 | 0.02235 | 6.38743 | -0.02351 |
| H130 | 0.22106  | 0.00000 | 0.77582 | 0.00312 | 0.77894 | 0.00064  |
| C131 | -0.37373 | 1.99897 | 4.35395 | 0.02082 | 6.37373 | 0.03830  |
| H132 | 0.21327  | 0.00000 | 0.78342 | 0.00331 | 0.78673 | -0.00138 |
| C133 | -0.15203 | 1.99876 | 4.13211 | 0.02117 | 6.15203 | 0.02859  |
| C134 | -0.38817 | 1.99898 | 4.36661 | 0.02258 | 6.38817 | 0.10155  |
| H135 | 0.22130  | 0.00000 | 0.77537 | 0.00332 | 0.77870 | -0.00309 |
| C136 | -0.33201 | 1.99897 | 4.31058 | 0.02246 | 6.33201 | 0.18707  |
| H137 | 0.22519  | 0.00000 | 0.77163 | 0.00318 | 0.77481 | -0.00558 |
| H138 | 0.21536  | 0.00000 | 0.78120 | 0.00343 | 0.78464 | -0.00420 |
| H139 | 0.21992  | 0.00000 | 0.77664 | 0.00344 | 0.78008 | 0.00093  |
| C140 | -0.12714 | 1.99870 | 4.10894 | 0.01949 | 6.12714 | 0.03111  |
| C141 | -0.14668 | 1.99875 | 4.12676 | 0.02117 | 6.14668 | 0.04805  |
| C142 | -0.28421 | 1.99935 | 4.26978 | 0.01508 | 6.28421 | -0.00010 |
| H143 | 0.20681  | 0.00000 | 0.78909 | 0.00410 | 0.79319 | 0.00020  |
| H144 | 0.20664  | 0.00000 | 0.79102 | 0.00234 | 0.79336 | -0.00001 |
| H145 | 0.18210  | 0.00000 | 0.81391 | 0.00399 | 0.81790 | 0.00001  |
| C146 | -0.10018 | 1.99911 | 4.08099 | 0.02009 | 6.10018 | 0.00000  |
| H147 | 0.22274  | 0.00000 | 0.77047 | 0.00679 | 0.77726 | 0.00007  |
| H148 | 0.19504  | 0.00000 | 0.80043 | 0.00453 | 0.80496 | 0.00000  |
| C149 | -0.08830 | 1.99915 | 4.06979 | 0.01936 | 6.08830 | -0.00001 |
| H150 | 0.19371  | 0.00000 | 0.80003 | 0.00626 | 0.80629 | 0.00014  |
| H151 | 0.20451  | 0.00000 | 0.79072 | 0.00477 | 0.79549 | -0.00004 |
| C152 | -0.08857 | 1.99917 | 4.07049 | 0.01891 | 6.08857 | 0.00005  |
| H153 | 0.20580  | 0.00000 | 0.78942 | 0.00479 | 0.79420 | 0.00005  |
| H154 | 0.19393  | 0.00000 | 0.79999 | 0.00608 | 0.80607 | 0.00007  |
| C155 | -0.10281 | 1.99913 | 4.08429 | 0.01939 | 6.10281 | -0.00015 |
| H156 | 0.19595  | 0.00000 | 0.79957 | 0.00448 | 0.80405 | 0.00000  |
| H157 | 0.22292  | 0.00000 | 0.77092 | 0.00616 | 0.77708 | 0.00005  |
| C158 | -0.28099 | 1.99938 | 4.26648 | 0.01513 | 6.28099 | -0.00004 |
| H159 | 0.18303  | 0.00000 | 0.81293 | 0.00404 | 0.81697 | 0.00001  |
| H160 | 0.20907  | 0.00000 | 0.78862 | 0.00231 | 0.79093 | 0.00000  |
| H161 | 0.19529  | 0.00000 | 0.80010 | 0.00461 | 0.80471 | -0.00003 |
| C162 | -0.27140 | 1.99933 | 4.25594 | 0.01613 | 6.27140 | 0.00020  |
| H163 | 0.17947  | 0.00000 | 0.81661 | 0.00392 | 0.82053 | 0.00009  |
| H164 | 0.20965  | 0.00000 | 0.78737 | 0.00298 | 0.79035 | 0.00003  |
| H165 | 0.20096  | 0.00000 | 0.79385 | 0.00520 | 0.79904 | 0.00002  |
| C166 | -0.10113 | 1.99913 | 4.08231 | 0.01970 | 6.10113 | 0.00042  |
| H167 | 0.20116  | 0.00000 | 0.79423 | 0.00461 | 0.79884 | 0.00002  |
| H168 | 0.21308  | 0.00000 | 0.78046 | 0.00646 | 0.78692 | 0.00048  |
| C169 | -0.09191 | 1.99912 | 4.07315 | 0.01964 | 6.09191 | -0.00001 |
| H170 | 0.20280  | 0.00000 | 0.79283 | 0.00437 | 0.79720 | 0.00002  |
| H171 | 0.20673  | 0.00000 | 0.78736 | 0.00590 | 0.79327 | 0.00006  |
| C172 | -0.10448 | 1.99918 | 4.08802 | 0.01728 | 6.10448 | 0.00001  |
| H173 | 0.20683  | 0.00000 | 0.78854 | 0.00463 | 0.79317 | 0.00009  |
| H174 | 0.19031  | 0.00000 | 0.80480 | 0.00489 | 0.80969 | -0.00001 |
| C175 | -0.09574 | 1.99913 | 4.07283 | 0.02379 | 6.09574 | 0.00099  |
| H176 | 0.19837  | 0.00000 | 0.79684 | 0.00479 | 0.80163 | 0.00007  |
| H177 | 0.23580  | 0.00000 | 0.75714 | 0.00706 | 0.76420 | 0.00129  |
| C178 | -0.27964 | 1.99934 | 4.26261 | 0.01768 | 6.27964 | 0.00101  |
| H179 | 0.19136  | 0.00000 | 0.80374 | 0.00490 | 0.80864 | -0.00004 |
| H180 | 0.22295  | 0.00000 | 0.77219 | 0.00486 | 0.77705 | 0.00106  |
| H181 | 0.17936  | 0.00000 | 0.81649 | 0.00414 | 0.82064 | 0.00006  |
| O182 | -0.61286 | 1.99979 | 6.60235 | 0.01073 | 8.61286 | 0.00001  |
| O183 | -0.60776 | 1.99977 | 6.59600 | 0.01199 | 8.60776 | 0.00000  |
| O184 | -0.60891 | 1.99979 | 6.59828 | 0.01084 | 8.60891 | 0.00028  |
| C185 | -0.27458 | 1.99934 | 4.25954 | 0.01570 | 6.27458 | 0.00063  |
| H186 | 0.18906  | 0.00000 | 0.80718 | 0.00376 | 0.81094 | -0.00003 |
| H187 | 0.22860  | 0.00000 | 0.76681 | 0.00459 | 0.77140 | 0.00047  |
| H188 | 0.17263  | 0.00000 | 0.82333 | 0.00404 | 0.82737 | 0.00000  |
| C189 | -0.09034 | 1.99915 | 4.07218 | 0.01901 | 6.09034 | 0.00001  |
| H190 | 0.20011  | 0.00000 | 0.79381 | 0.00608 | 0.79989 | 0.00001  |
| H191 | 0.19635  | 0.00000 | 0.79914 | 0.00451 | 0.80365 | 0.00001  |
| C192 | -0.09488 | 1.99915 | 4.07574 | 0.01999 | 6.09488 | 0.00013  |

|           |          |           |           |         |         |         |
|-----------|----------|-----------|-----------|---------|---------|---------|
| H193      | 0.19959  | 0.00000   | 0.79310   | 0.00731 | 0.80041 | 0.00019 |
| H194      | 0.19929  | 0.00000   | 0.79614   | 0.00457 | 0.80071 | 0.00001 |
| C195      | -0.09479 | 1.99914   | 4.07625   | 0.01939 | 6.09479 | 0.00064 |
| H196      | 0.19628  | 0.00000   | 0.79930   | 0.00442 | 0.80372 | 0.00005 |
| H197      | 0.21191  | 0.00000   | 0.78210   | 0.00598 | 0.78809 | 0.00021 |
| C198      | -0.08890 | 1.99917   | 4.07078   | 0.01895 | 6.08890 | 0.00020 |
| H199      | 0.20198  | 0.00000   | 0.79344   | 0.00458 | 0.79802 | 0.00000 |
| H200      | 0.19584  | 0.00000   | 0.79837   | 0.00579 | 0.80416 | 0.00004 |
| C201      | -0.28593 | 1.99935   | 4.26995   | 0.01663 | 6.28593 | 0.00096 |
| H202      | 0.17885  | 0.00000   | 0.81687   | 0.00428 | 0.82115 | 0.00032 |
| H203      | 0.23481  | 0.00000   | 0.76084   | 0.00435 | 0.76519 | 0.00024 |
| H204      | 0.18447  | 0.00000   | 0.81178   | 0.00376 | 0.81553 | 0.00011 |
| =====     |          |           |           |         |         |         |
| * Total * | 0.00000  | 511.79357 | 519.69800 | 2.50843 | *****   | 2.00000 |

**Table S17.** NBO charges for “naked” C<sub>20</sub>H<sub>10</sub><sup>3-</sup> (PBE0/cc-pvDZ).

| Atom No   | Natural Charge | Natural Population |          |         |           | Natural Spin Density |
|-----------|----------------|--------------------|----------|---------|-----------|----------------------|
|           |                | Core               | Valence  | Rydberg | Total     |                      |
| C 1       | -0.32044       | 1.99902            | 4.30368  | 0.01774 | 6.32044   | 0.17076              |
| C 2       | -0.38095       | 1.99902            | 4.36365  | 0.01827 | 6.38095   | 0.01351              |
| C 3       | -0.36522       | 1.99904            | 4.34758  | 0.01860 | 6.36522   | 0.09059              |
| C 4       | -0.32889       | 1.99901            | 4.31233  | 0.01755 | 6.32889   | 0.12764              |
| C 5       | -0.39981       | 1.99904            | 4.38194  | 0.01882 | 6.39981   | -0.03376             |
| H 6       | 0.15712        | 0.00000            | 0.83801  | 0.00487 | 0.84288   | -0.00546             |
| H 7       | 0.15497        | 0.00000            | 0.84034  | 0.00469 | 0.84503   | -0.00057             |
| H 8       | 0.15760        | 0.00000            | 0.83767  | 0.00473 | 0.84240   | -0.00294             |
| H 9       | 0.15570        | 0.00000            | 0.83945  | 0.00486 | 0.84430   | -0.00413             |
| H 10      | 0.15619        | 0.00000            | 0.83917  | 0.00464 | 0.84381   | 0.00090              |
| C 11      | -0.09902       | 1.99879            | 4.08199  | 0.01823 | 6.09902   | 0.02270              |
| C 12      | -0.09352       | 1.99879            | 4.07655  | 0.01818 | 6.09352   | 0.03692              |
| C 13      | -0.13115       | 1.99880            | 4.11376  | 0.01860 | 6.13115   | -0.04444             |
| C 14      | -0.08229       | 1.99879            | 4.06540  | 0.01810 | 6.08229   | 0.07544              |
| C 15      | -0.12627       | 1.99880            | 4.10893  | 0.01854 | 6.12627   | -0.03519             |
| C 16      | -0.08227       | 1.99878            | 4.06487  | 0.01862 | 6.08227   | 0.05644              |
| C 17      | -0.07440       | 1.99879            | 4.05703  | 0.01858 | 6.07440   | 0.07100              |
| C 18      | -0.11739       | 1.99877            | 4.09981  | 0.01881 | 6.11739   | -0.00708             |
| C 19      | -0.05284       | 1.99880            | 4.03556  | 0.01849 | 6.05284   | 0.11087              |
| C 20      | -0.11325       | 1.99877            | 4.09569  | 0.01879 | 6.11325   | 0.00038              |
| C 21      | -0.35546       | 1.99903            | 4.33796  | 0.01846 | 6.35546   | 0.11473              |
| C 22      | -0.38907       | 1.99903            | 4.37163  | 0.01842 | 6.38907   | -0.00554             |
| C 23      | -0.31659       | 1.99902            | 4.29996  | 0.01761 | 6.31659   | 0.17278              |
| C 24      | -0.39663       | 1.99904            | 4.37874  | 0.01885 | 6.39663   | -0.02047             |
| C 25      | -0.33770       | 1.99901            | 4.32103  | 0.01765 | 6.33770   | 0.10712              |
| H 26      | 0.15762        | 0.00000            | 0.83762  | 0.00476 | 0.84238   | -0.00369             |
| H 27      | 0.15506        | 0.00000            | 0.84027  | 0.00467 | 0.84494   | 0.00002              |
| H 28      | 0.15688        | 0.00000            | 0.83824  | 0.00489 | 0.84312   | -0.00553             |
| H 29      | 0.15657        | 0.00000            | 0.83878  | 0.00465 | 0.84343   | 0.00050              |
| H 30      | 0.15546        | 0.00000            | 0.83971  | 0.00483 | 0.84454   | -0.00349             |
| =====     |                |                    |          |         |           |                      |
| * Total * | -3.00000       | 39.97814           | 92.60736 | 0.41450 | 133.00000 | 1.00000              |

**Table S18.** NBO charges for neutral C<sub>20</sub>H<sub>10</sub> (PBE0/cc-pvDZ).

| Atom No | Natural Charge | Natural Population |         |         |         |
|---------|----------------|--------------------|---------|---------|---------|
|         |                | Core               | Valence | Rydberg | Total   |
| C 1     | -0.20947       | 1.99897            | 4.19404 | 0.01646 | 6.20947 |
| C 2     | -0.20682       | 1.99898            | 4.19155 | 0.01628 | 6.20682 |
| C 3     | -0.20223       | 1.99899            | 4.18686 | 0.01638 | 6.20223 |
| C 4     | -0.21196       | 1.99897            | 4.19660 | 0.01638 | 6.21196 |
| C 5     | -0.20067       | 1.99900            | 4.18541 | 0.01626 | 6.20067 |
| H 6     | 0.23997        | 0.00000            | 0.75680 | 0.00323 | 0.76003 |
| H 7     | 0.24035        | 0.00000            | 0.75651 | 0.00314 | 0.75965 |
| H 8     | 0.23958        | 0.00000            | 0.75724 | 0.00318 | 0.76042 |
| H 9     | 0.24042        | 0.00000            | 0.75638 | 0.00321 | 0.75958 |
| H 10    | 0.23978        | 0.00000            | 0.75709 | 0.00313 | 0.76022 |
| C 11    | -0.05453       | 1.99875            | 4.03892 | 0.01686 | 6.05453 |



|           |          |          |          |         |           |
|-----------|----------|----------|----------|---------|-----------|
| C 12      | -0.05573 | 1.99875  | 4.04014  | 0.01684 | 6.05573   |
| C 13      | -0.04915 | 1.99876  | 4.03349  | 0.01690 | 6.04915   |
| C 14      | -0.05820 | 1.99875  | 4.04267  | 0.01678 | 6.05820   |
| C 15      | -0.04997 | 1.99876  | 4.03431  | 0.01689 | 6.04997   |
| C 16      | -0.01400 | 1.99871  | 3.99744  | 0.01784 | 6.01400   |
| C 17      | -0.01400 | 1.99871  | 3.99743  | 0.01785 | 6.01400   |
| C 18      | -0.01419 | 1.99870  | 3.99769  | 0.01781 | 6.01419   |
| C 19      | -0.01396 | 1.99872  | 3.99737  | 0.01788 | 6.01396   |
| C 20      | -0.01417 | 1.99870  | 3.99766  | 0.01781 | 6.01417   |
| C 21      | -0.20364 | 1.99899  | 4.18824  | 0.01641 | 6.20364   |
| C 22      | -0.20523 | 1.99899  | 4.18998  | 0.01627 | 6.20523   |
| C 23      | -0.21068 | 1.99897  | 4.19525  | 0.01645 | 6.21068   |
| C 24      | -0.20019 | 1.99900  | 4.18492  | 0.01627 | 6.20019   |
| C 25      | -0.21139 | 1.99897  | 4.19606  | 0.01636 | 6.21139   |
| H 26      | 0.23962  | 0.00000  | 0.75718  | 0.00319 | 0.76038   |
| H 27      | 0.24025  | 0.00000  | 0.75662  | 0.00313 | 0.75975   |
| H 28      | 0.24008  | 0.00000  | 0.75669  | 0.00323 | 0.75992   |
| H 29      | 0.23968  | 0.00000  | 0.75718  | 0.00313 | 0.76032   |
| H 30      | 0.24046  | 0.00000  | 0.75635  | 0.00319 | 0.75954   |
| =====     |          |          |          |         |           |
| * Total * | 0.00000  | 39.97718 | 89.65406 | 0.36876 | 130.00000 |

## EDA Analysis of Sandwich-Type Aggregates

The bonding between bowl-shaped fragments and positively charged alkali metal belt (see Figures S12 and S13 for details) was further investigated by the energy decomposition analysis (EDA) developed by Morokuma and by Ziegler and Rauk.<sup>[17]</sup> For this purpose, single-point calculations were performed by the ADF program package<sup>[18]</sup> with the same functional. All atoms were described by uncontracted Slater-type orbitals (STOs) with TZ2P quality as basis functions.<sup>[19]</sup> An auxiliary set of s, p, d, and f STOs was used to fit the molecular densities and to represent the Coulomb and exchange potentials accurately in each SCF cycle.<sup>[20]</sup> Scalar relativistic effects have been taken into account by ZORA. Further details on the EDA can be found in literature.<sup>[21]</sup>

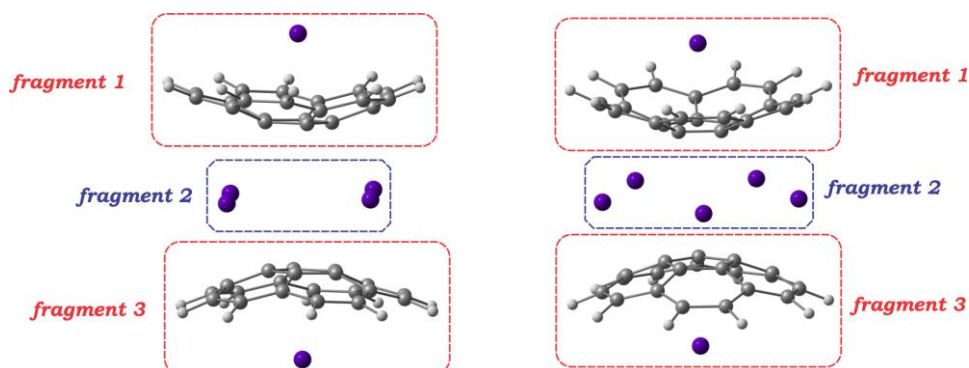

**Figure S12.** EDA Fragmentation scheme in **1-small** and **1H-small** models (*left*) as well as for **1<sup>4-</sup>-small** (*right*).

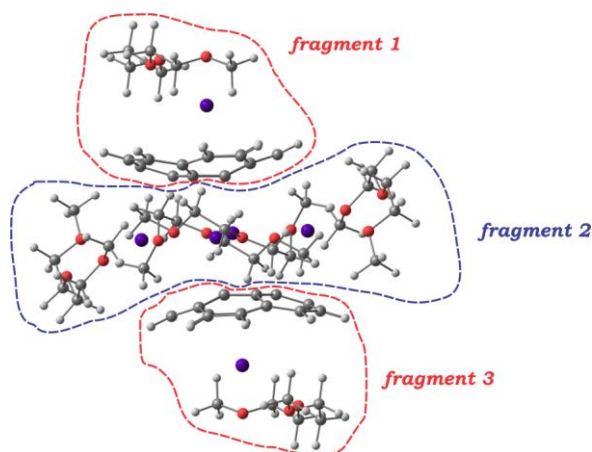

**Figure S13.** EDA Fragmentation scheme in **1**-full and **1H**-full models.

## References

- [1] N. V. Kozhemyakina, J. Nuss and M. Jansen, *Z. Anorg. Allg. Chem.*, 2009, **635**, 1355-1361.
- [2] G. Mehta and G. Panda, *Tetrahedron Lett.*, 1997, **38**, 2145-2148.
- [3] L. T. Scott, P.-C. Cheng, M. M. Hashemi, M. S. Bratcher, D. T. Meyer and H. B. Warren, *J. Am. Chem. Soc.*, 1997, **119**, 10963-10968.
- [4] A. Sygula, G. Xu, Z. Marcinow and P. W. Rabideau, *Tetrahedron*, 2001, **57**, 3637-3644.
- [5] (a) M. Baumgarten, J. L. Gherghel, M. Wagner, A. Weitz, M. Rabinovitz, P.-C. Cheng and L. T. Scott, *J. Am. Chem. Soc.*, 1995, **117**, 6254-6257. (b) G. Zilber, V. Rozenshtein, P.-C. Cheng, L. T. Scott, M. Rabinovitz and H. Levanon, *J. Am. Chem. Soc.*, 1995, **117**, 10720-10725.
- [6] *SADABS, Bruker AXS*. **2001**.
- [7] G. M. Sheldrick, *SHELXTL, Version 6.14, University of Göttingen, Germany* **2000**.
- [8] A. A. Granovsky, Firefly, v.8.1.0, <http://classic.chem.msu.su/gran/gamess/index.html>.
- [9] F. Neese, *ORCA*; University of Bonn: Bonn, Germany, **2009**.
- [10] (a) D. A. Pantazis, X.-Y. Chen, C. R. Landis and F. Neese, *J. Chem. Theory Comput.*, 2008, **4**, 908-919. (b) M. Buhl, C. Reimann, D. A. Pantazis, T. Bredow and F. Neese, *J. Chem. Theory Comput.*, 2008, **4**, 1449-1459.
- [11] F. Neese, F. Wennmohs, A. Hansen and U. Becker, *Chem. Phys.*, 2009, **356**, 98-109.
- [12] (a) F. Weinhold and C. A. Landis, *Valency and Bonding: A Natural Bond Orbital Donor–Acceptor Perspective*, Cambridge University Press: Cambridge, 2005. (b) A. E. Reed, L. A. Curtiss and F. Weinhold, *Chem. Rev.*, 1988, **88**, 899-926.
- [13] (a) E. D. Glendening, J. K. Badenhoop, A. E. Reed, J. E. Carpenter, J. A. Bohmann, C. M. Morales and F. Weinhold, *NBO 6.0*, 2013, University of Wisconsin, Madison. (b) E. D. Glendening, C. R. Landi and F. Weinhold, *J. Comp. Chem.*, 2013, **34**, 1429.
- [14] K. Yamaguchi, Y. Takahara and T. Fueno in: V.H. Smith (Ed.) *Applied Quantum Chemistry*, Reidel, Dordrecht, 1986, pp 155.
- [15] A. A. Granovsky, *J. Chem. Phys.*, 2011, **134**, 214113.
- [16] H. Nakano, *J. Chem. Phys.*, 1993, **99**, 7983-7992.
- [17] (a) K. J. Morokuma, *Chem. Phys.*, 1971, **55**, 1236. (b) T. Ziegler and A. Rauk, *Inorg. Chem.*, 1979, **18**, 1558. (c) T. Ziegler and A. Rauk, *Inorg. Chem.*, 1979, **18**, 1755.
- [18] (a) C. Fonseca Guerra, J. G. Snijders, G. te Velde and E. J. Baerends, *Theor. Chem. Acc.*, 1998, **99**, 391. (b) *ADF2008.01*, SCM, Vrije Universiteit, Amsterdam,

- Netherlands, <http://www.scm.com>. (c) G. te Velde, F. M. Bickelhaupt, E. J. Baerends, C. Fonseca Guerra, S. J. A. van Gisbergen, J. G. Snijders and T. Ziegler, *J. Comput. Chem.*, 2001, **22**, 931.
- [19] J. G. Snijders, E. J. Baerends and P. Vernooijs, *At. Data Nucl. Data Tables*, 1982, **26**, 483.
- [20] J. Krijn and E. J. Baerends, *Fit Functions in the HFS-Method*, 1984, Internal Report (In Dutch), Vrije Universiteit, Amsterdam, Netherlands.
- [21] (a) M. Lein and G. Frenking, in *Theory and Application of Computational Chemistry*, ed. Dekstra, C. 2005. (b) M. von Hopffgarten and G. Frenking, in *Computational Inorganic and Bioinorganic Chemistry*, ed. E. Solomon, 2009, pp. 3-15. (c) M. Lein, A. Szabo, A. Kovac and G. Frenking, *Faraday Discuss.*, 2003, **124**, 365. (d) G. Frenking, K. Wichmann, N. Frohlich, C. Loschen, M. Lein, J. Frunzke and V. M. Rayon, *Coord. Chem. Rev.*, 2003, **238-239**, 55-82. (e) A. Krapp, F. M. Bickelhaupt and G. Frenking, *Chem. Eur. J.*, 2006, **12**, 9196-9216. (f) A. Krapp and G. Frenking, *J. Comput. Chem.*, 2007, **28**, 15-24. (g) M. von Hopffgarten and G. Frenking, *WIREs Comput. Mol. Sci.*, 2012, **2**, 9196.
